# Supplementary material for: Optimization of TAM16, a Benzofuran That Inhibits the Thioesterase Activity of Pks13; Evaluation toward a Preclinical Candidate for a Novel Antituberculosis Clinical Target
Source: PubMed Central journal article supplement (PMC8762665; doi:10.1021/acs.jmedchem.1c01586), 2021-12-15

### Supporting information for:

**Optimisation of TAM16, a benzofuran that inhibits the thioesterase activity of Pks13; evaluation towards a preclinical candidate for a novel anti-tuberculosis clinical target.**

Caroline Wilson<sup>‡λαμν</sup>, Peter Ray<sup>‡λμν</sup>, Fabio Zuccotto<sup>‡λμν</sup>, Jorge Hernandez<sup>‡α</sup>, Anup Aggarwal<sup>‡πμ</sup>, Claire Mackenzie<sup>‡α</sup>, Nicola Caldwell<sup>‡α</sup>, Malcolm Taylor<sup>‡α</sup>, Margaret Huggett<sup>‡α</sup>, Michael Mathieson<sup>‡α</sup>, Dinakaran Murugesan<sup>‡α</sup>, Alasdair Smith<sup>‡α</sup>, Susan Davis<sup>‡α</sup>, Mattia Cocco<sup>‡α</sup>, Maloy K. Parai<sup>‡αμ</sup>, Arjun Acharya<sup>‡α</sup>, Fabio Tamaki<sup>‡π</sup>, Paul Scullion<sup>‡ö</sup>, Ola Epemolu<sup>‡öμ</sup>, Jennifer Riley<sup>‡ö</sup>, Laste Stojanovski<sup>‡ö</sup>, Eva Maria Lopez-Román<sup>‡π</sup>, Pedro Alfonso Torres-Gómez<sup>‡π</sup>, Ana Maria Toledo<sup>‡π</sup>, Laura Guijarro-Lopez<sup>‡π</sup>, Isabel Camino<sup>‡ö</sup>, Curtis A. Engelhart<sup>‡πβ</sup>, Dirk Schnappinger<sup>‡πβ</sup>, Lisa M. Massoudi<sup>‡π</sup>, Anne Lenaerts<sup>‡π</sup>, Gregory T. Robertson<sup>‡πβ</sup>, Chris Walpole<sup>‡μβ</sup>, David Matthews<sup>‡μ</sup>, David Floyd<sup>‡μ</sup>, James C. Sacchetti<sup>‡μβ</sup>, Kevin D. Read<sup>‡öβ</sup>, Lourdes Encinas<sup>‡μ</sup>, Robert H Bates<sup>‡μβ</sup>, Simon R Green<sup>‡πμνβ\*</sup> and Paul G Wyatt<sup>‡μβ\*</sup>

<sup>‡</sup>Drug Discovery Unit, Division of Biological Chemistry and Drug Discovery, College of Life Sciences, University of Dundee, Dundee, DD1 5EH, UK

<sup>‡</sup>Department of Biochemistry and Biophysics, Texas A&M University, College Station, Texas 77843, USA

<sup>‡</sup>Global Health Pharma R&D, GlaxoSmithKline, Severo Ochoa 2, Tres Cantos, 28760, Madrid, Spain

<sup>‡</sup>Department of Microbiology and Immunology, Weill Cornell Medical College, New York, NY, 10065, USA

<sup>‡</sup>Mycobacteria Research Laboratories, Department of Microbiology, Immunology, and Pathology, Colorado State University, 200 W. Lake Street, Fort Collins, Colorado 80523-1682, USA

<sup>‡</sup>Structural Genomics Consortium, Research Institute of the McGill University Health Centre, 1001 Boulevard Décarie, Site Glen Block E, ES1.1614, Montréal, QC H4A 3J1, Canada

<sup>λ</sup>contributed equally to medicinal chemistry design and planning, <sup>α</sup>molecule design and synthesis, <sup>π</sup>planned/executed biological/crystallographic studies, <sup>ö</sup>planned/executed DMPK/safety studies, <sup>μ</sup>contributed to monthly project planning meetings, <sup>ν</sup>wrote draft manuscript, <sup>β</sup>edited manuscript and <sup>\*</sup>corresponding authors.

#### \*Corresponding Authors

Simon R Green ([s.r.green@dundee.ac.uk](mailto:s.r.green@dundee.ac.uk))

Paul G Wyatt ([p.g.wyatt@dundee.ac.uk](mailto:p.g.wyatt@dundee.ac.uk))

#### Supporting Information contents:

Table S1. X-ray data collection and refinement statistics for Pks13 TE – Compound 6 complex

Synthetic schemes S1-S20 and chemistry experimental for molecules 21-47

Representative *in vivo* compound HPLC UV traces

Manuscript key in *in vitro* data table with PAINS alert analysis and SMILES (separate csv file)

**Table S1. X-ray data collection and refinement statistics for Pks13 TE – Compound 6 complex**

|                                    | <b>Pks13 TE – Compound 6 complex</b>    |
|------------------------------------|-----------------------------------------|
| <b>PDB ID</b>                      | <b>7M7V</b>                             |
| <b>Data collection</b>             |                                         |
| Space group                        | <i>P</i> 21 21 2                        |
| Unit cell dimensions               |                                         |
| <i>a</i> , <i>b</i> , <i>c</i> (Å) | 89.97, 110.28, 57.63                    |
| $\alpha$ , $\beta$ , $\gamma$ (°)  | 90, 90, 90                              |
| Resolution range (Å)               | 48.53 - 2.29 (2.37 - 2.29) <sup>a</sup> |
| Total reflections                  | 161516 (16353)                          |
| Unique reflections                 | 26061 (2545)                            |
| <i>R</i> <sub>merge</sub> (%)      | 15.1 (173.8)                            |
| <i>I</i> / $\sigma$ <i>I</i>       | 9.6 (1.7)                               |
| Completeness (%)                   | 97.7 (98.2)                             |
| Redundancy                         | 6.2 (6.4)                               |
| CC <sub>1/2</sub> (%)              | 99.4 (44.3)                             |
| <b>Refinement</b>                  |                                         |
| Reflections used in refinement     | 25910 (2545)                            |
| <i>R</i> <sub>work</sub> (%)       | 22.3 (30.6)                             |
| <i>R</i> <sub>free</sub> (%)       | 26.9 (36.2)                             |
| Number of atoms                    |                                         |
| Protein                            | 4035                                    |
| Ligands                            | 60                                      |
| Water                              | 96                                      |
| Average B-factor (Å <sup>2</sup> ) | 51.2                                    |
| Protein                            | 51.2                                    |
| Ligand/ion                         | 57.8                                    |
| Water                              | 46.2                                    |
| RMS deviations                     |                                         |
| Bond lengths (Å)                   | 0.010                                   |
| Bond angles (°)                    | 0.97                                    |
| Ramachandran Plot                  |                                         |
| Favored (%)                        | 98.11                                   |
| Allowed (%)                        | 1.89                                    |
| Outliers (%)                       | 0                                       |

<sup>a</sup>Statistics for the highest-resolution shell are shown in parentheses. Data for the structure was collected from a single crystal.

## Chemistry Experimental Section

### Scheme S1

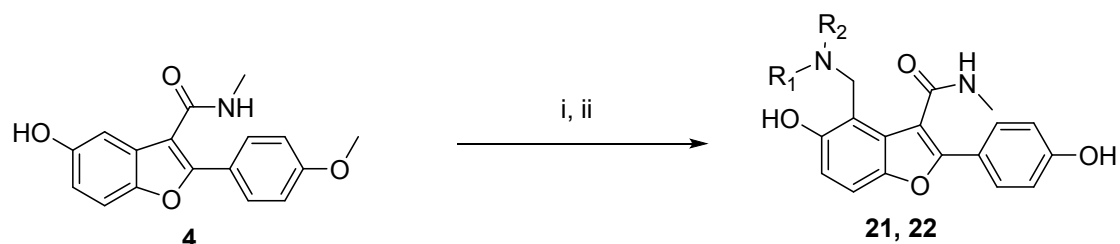

*Reagents and conditions:* (i) Formaldehyde, amine, dioxane, water, 80 °C; (ii) BBr<sub>3</sub>, DCM, 0 °C to 25 °C or pyridine hydrochloride, 180 °C.

#### 4-((3,3-difluoropiperidin-1-yl)methyl)-5-hydroxy-2-(4-hydroxyphenyl)-N-methylbenzofuran-3-carboxamide (21)

To a solution of 5-hydroxy-2-(4-methoxyphenyl)-N-methylbenzofuran-3-carboxamide (100 mg, 336 μmol) in dioxane (1.6 mL) and H<sub>2</sub>O (1.6 mL) was added formaldehyde 37% solution in water (32 mg, 403 μmol) and 3,3-difluoropiperidine (40 mg, 336 μmol). The mixture was stirred at 80 °C for 15 h. The mixture was concentrated under reduced pressure, extracted with ethyl acetate and evaporated to give a residue. The residue was purified by preparative HPLC (0.225% Formic Acid-ACN) to give impure intermediate. (30 mg, 69 μmol, 21%). The reaction was repeated and batches combined. To a solution of 4-((3,3-difluoropiperidin-1-yl)methyl)-5-hydroxy-2-(4-methoxyphenyl)-N-methylbenzofuran-3-carboxamide (60 mg, 139 μmol) in DCM (1 mL) was added BBr<sub>3</sub> (104 mg, 418 μmol) in one portion at 0 °C under N<sub>2</sub>. The mixture was stirred at 25 °C for 15 h. The reaction solution was quenched by aqueous NaHCO<sub>3</sub> (1 M) till pH = 7 at 0 °C. The reaction solution was purified by preparative HPLC (0.225% Formic Acid-ACN) to afford the title compound (30 mg, 71 μmol, 52%). LCMS: m/z 417 [M+H<sup>+</sup>]. <sup>1</sup>H NMR (400 MHz, DMSO) δ 10.09 (br s, 2H), 8.51 (d, J=4.6 Hz, 1H), 7.55-7.59 (m, 2H), 7.39-7.35 (m, 1H), 6.90-6.86 (m, 2H), 6.79-6.76 (m, 1H), 3.83 (s, 2H), 2.79-2.73 (m, 5H), 2.50-2.45 (m, 2H), 1.96-1.65 (m, 4H).

#### 4-((4-fluoropiperidin-1-yl)methyl)-5-hydroxy-2-(4-hydroxyphenyl)-N-methylbenzofuran-3-carboxamide formate (22)

To a solution of 5-hydroxy-2-(4-methoxyphenyl)-N-methylbenzofuran-3-carboxamide (200 mg, 672 μmol) in dioxane (1.6 mL) and H<sub>2</sub>O (1.6 mL) was added formaldehyde 37% solution in water (65 mg, 807 μmol) and 4-fluoropiperidine (112 mg, 807 μmol). The mixture was stirred at 80 °C overnight, concentrated under vacuum, extracted with ethyl acetate and evaporated to afford a residue. The residue was purified by preparative HPLC (0.1%TFA-ACN) to give impure intermediate (20 mg, 48 μmol, 7 %). Reaction repeated and batches combined. A solution of 4-((4-fluoropiperidin-1-yl)methyl)-5-hydroxy-2-(4-methoxyphenyl)-N-methyl benzofuran-3-carboxamide (50 mg, 121 μmol) and pyridine hydrochloride (3.22 g, 27.88 mmol) was stirred at 180 °C for 2 h. The mixture was evaporated to give a residue. The residue was purified by preparative HPLC (water (0.225%Formic Acid)-ACN) to give the title compound (25 mg, 61.59 μmol, 51%). LCMS: m/z 399 [M+H<sup>+</sup>]. <sup>1</sup>H NMR (500 MHz, DMSO) δ 9.92 (br s, 1H), 8.52-8.47 (m, 1H), 7.59-7.56 (m, 2H), 7.36-7.33 (m, 1H), 6.90-6.87 (m, 2H), 6.76-6.74 (m, 1H), 4.82-4.66 (m, 1H), 3.76 (s, 2H), 2.79-2.77 (m, 3H), 2.62-2.53 (m, 2H), 2.47-2.38 (m, 2H), 1.93-1.81 (m, 2H), 1.77-1.72 (m, 2H).

## Scheme S2

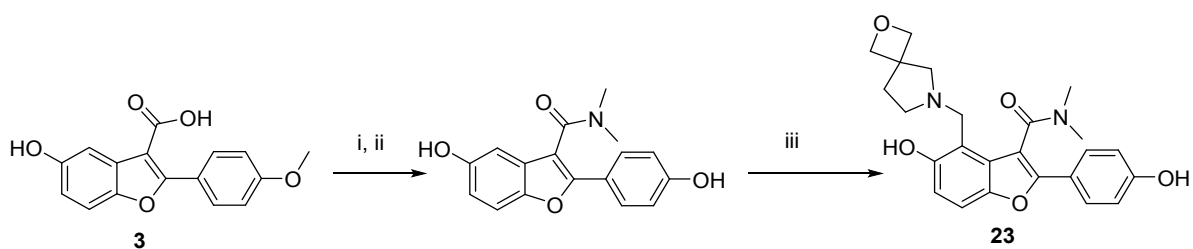

*Reagents and conditions:* (i) HATU, DIPEA, N-methylmethanamine, rt; (ii)  $\text{BBr}_3$ , DCM,  $-78^\circ\text{C}$  to rt; (iii) formaldehyde, 2-oxa-7-azaspiro[3.4]octane; oxalic acid, DIPEA, EtOH,  $\text{H}_2\text{O}$ ,  $80^\circ\text{C}$ .

### 5-hydroxy-2-(4-hydroxyphenyl)-N,N-dimethylbenzofuran-3-carboxamide

To a suspension of 5-hydroxy-2-(4-methoxyphenyl)benzofuran-3-carboxylic acid (250 mg, 0.87 mmol) in THF (5 mL) were successively added HATU (367 mg, 0.96 mmol), DIPEA (227 mg, 1.75 mmol) and N-methylmethanamine (47 mg, 1.05 mmol) and the mixture was stirred for 3 h at rt. Water was added and the mixture was extracted with EtOAc (x3), washed with brine, dried and concentrated. The residues were purified by column chromatography (50% EtOAc in heptane) to give impure 5-hydroxy-2-(4-methoxyphenyl)-N,N-dimethylbenzofuran-3-carboxamide (270 mg, 0.73 mmol, 83%). To a solution of 5-hydroxy-2-(4-methoxyphenyl)-N,N-dimethylbenzofuran-3-carboxamide (250 mg, 0.80 mmol) in DCM (5 mL) at under  $\text{N}_2$  was added tribromoborane (442 mg, 1.76 mmol) at  $-78^\circ\text{C}$  and the mixture was stirred at rt for 2 h. Aqueous sat  $\text{NaHCO}_3$  was added, phases were separated and the aqueous phase was extracted with EtOAc (x3), dried and concentrated. The residue was purified by silica column chromatography (50-70% EtOAc in heptane) to give the title compound (74 mg, 0.23 mmol, 26%). LCMS:  $m/z$  298  $[\text{M}+\text{H}]^+$ .  $^1\text{H}$  NMR (400 MHz, DMSO)  $\delta$  9.99 - 9.99 (m, 1H), 9.30 (s, 1H), 7.57 - 7.54 (m, 2H), 7.43 - 7.40 (m, 1H), 6.90 - 6.87 (m, 2H), 6.78 - 6.72 (m, 2H), 3.09 (s, 3H), 2.81 (s, 3H).

### 4-((2-oxa-6-azaspiro[3.4]octan-6-yl)methyl)-5-hydroxy-2-(4-hydroxyphenyl)-N,N-dimethylbenzofuran-3-carboxamide formate (23)

To a solution of 5-hydroxy-2-(4-hydroxyphenyl)-N,N-dimethylbenzofuran-3-carboxamide (30 mg, 0.10 mmol) 2-oxa-7-azaspiro[3.4]octane; oxalic acid (22 mg, 0.11 mmol) and DIPEA (16 mg, 0.13 mmol) in ethanol (1 mL) and water (0.2 mL) was added formaldehyde 37% solution in water (9 mg, 0.12 mmol) and the mixture was stirred at  $80^\circ\text{C}$  overnight. Saturated aqueous  $\text{NaHCO}_3$  was added and the mixture was extracted with EtOAc dried and concentrated to afford a residue. Purification by prep HPLC (acidic, 5-95% ACN) to give the title compound (12 mg, 0.02 mmol, 24%). LCMS:  $m/z$  423  $[\text{M}+\text{H}]^+$ .  $^1\text{H}$  NMR (400 MHz, DMSO)  $\delta$  8.16 (s, 1H), 7.51 - 7.48 (m, 2H), 7.37 - 7.34 (m, 1H), 6.90 - 6.87 (m, 2H), 6.80 - 6.77 (m, 1H), 4.49 - 4.40 (m, 4H), 3.82 (d,  $J=13.0$  Hz, 1H), 3.65 (d,  $J=13.0$  Hz, 1H), 3.05 (s, 3H), 2.70 - 2.69 (m, 5H), 2.63 - 2.54 (m, 1H), 2.46-2.37 (m, 1H), 2.10 - 2.05 (m, 2H).

### Scheme S3

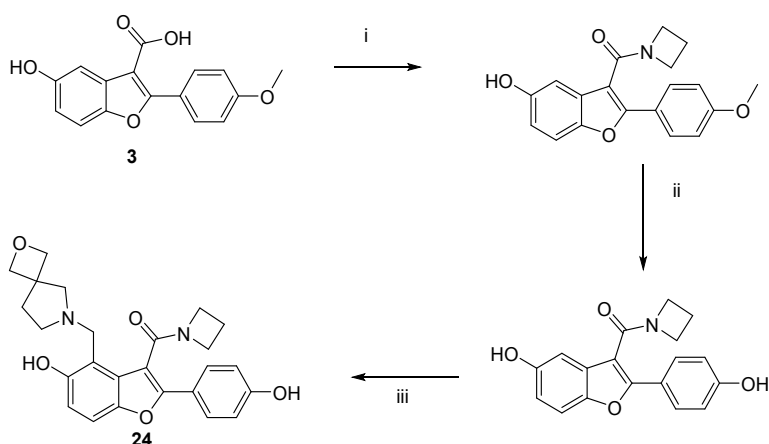

*Reagents and conditions:* (i) Azetidine, HATU, DIPEA, rt; (ii) BBr<sub>3</sub>, DCM, 0 °C- to 25 °C; (iii) formaldehyde, 2-oxa-7-azaspiro[3.4]octane; oxalic acid, DIPEA, EtOH, H<sub>2</sub>O, 60 °C.

#### azetidinium-1-yl(5-hydroxy-2-(4-methoxyphenyl)benzofuran-3-yl)methanone

To a suspension of 5-hydroxy-2-(4-methoxyphenyl)benzofuran-3-carboxylic acid (100 mg, 0.35 mmol) and azetidine (24 mg, 0.42 mmol) in DMF (2 mL) were successively added HATU (147 mg, 0.38 mmol) and DIPEA (136 mg, 1.05 mmol) and the mixture was stirred at rt overnight. Water was added and the mixture was extracted with EtOAc (x3), washed with brine, dried and concentrated. The residue was purified by silica column chromatography (30-50% EtOAc in heptane) to give impure title compound (98 mg, 0.255 mmol, 72%). LCMS: m/z 324 [M+H]<sup>+</sup>. <sup>1</sup>H NMR (400 MHz, CDCl<sub>3</sub>) δ 8.62 (s, 1H), 7.81 - 7.78 (m, 2H), 7.46 (d, J=2.4 Hz, 1H), 7.38 - 7.35 (m, 1H), 7.06 - 7.03 (m, 2H), 6.91 (dd, J=2.6, 8.8 Hz, 1H), 4.30 - 4.24 (m, 2H), 3.92 (s, 3H), 3.69 - 3.63 (m, 2H), 2.20 - 2.11 (m, 2H).

#### azetidinium-1-yl(5-hydroxy-2-(4-hydroxyphenyl)benzofuran-3-yl)methanone

To a solution of azetidinium-1-yl(5-hydroxy-2-(4-methoxyphenyl)benzofuran-3-yl)methanone (5.00 g, 15.46 mmol) in DCM (50 mL) was added BBr<sub>3</sub> (11.62 g, 46.38 mmol) at 0 °C under N<sub>2</sub>. The mixture was stirred at 25 °C for 15 h. The reaction solution was quenched by EtOH at 0 °C. The reaction mixture was filtered and the filtered cake was washed with water, dried under vacuum to give the title compound (3.00 g, 9.70 mmol, 63%) as a brown solid. <sup>1</sup>H NMR (400 MHz, DMSO) δ 10.04 (s, 1H), 9.32 (s, 1H), 7.71 - 7.62 (m, 2H), 7.40 (d, J=8.8 Hz, 1H), 6.91 (d, J=8.8 Hz, 3H), 6.75 (dd, J=2.5, 8.8 Hz, 1H), 4.07 (t, J=7.7 Hz, 2H), 3.70 - 3.60 (m, 2H), 2.14 (q, J=7.7 Hz, 2H).

#### (4-(2-oxa-6-azaspiro[3.4]octan-6-ylmethyl)-5-hydroxy-2-(4-hydroxyphenyl)benzofuran-3-yl)(azetidinium-1-yl)methanone formate (24)

A solution of azetidinium-1-yl(5-hydroxy-2-(4-hydroxyphenyl)benzofuran-3-yl)methanone (500 mg, 1.62 mmol), 2-oxa-7-azaspiro[3.4]octane.oxalic acid (362 mg, 1.78 mmol) and formaldehyde 37% solution in water (144 mg, 1.78 mmol) in EtOH (10 mL) and H<sub>2</sub>O (2 mL) was stirred at 60 °C for 40 h. The reaction solution was concentrated under vacuum. The reaction was purified by prep-HPLC (water (0.225% formic acid)-ACN; 6%-36%) to give the title compound (300 mg, 0.62 mmol, 37%). LCMS: Rt m/z 435 [M+H]<sup>+</sup>. <sup>1</sup>H NMR (400 MHz, DMSO) δ 8.22 (s, 1H), 7.57 (d, J=8.7 Hz, 2H), 7.33 (d, J=8.7 Hz, 1H), 6.92 (d, J=8.8 Hz, 2H), 6.79 (d, J=8.8 Hz, 1H), 4.59 - 4.39 (m, 4H), 4.02 (t, J=7.6 Hz, 2H), 3.84 (br s, 2H), 3.55 (br s, 2H), 2.82 (s, 2H), 2.65 - 2.54 (m, 2H), 2.17 - 2.02 (m, 4H). HRMS (ESI): m/z calcd for C<sub>25</sub>H<sub>27</sub>N<sub>2</sub>O<sub>5</sub> [M+H]<sup>+</sup>: 435.1904. Found 435.1929.

## Scheme S4

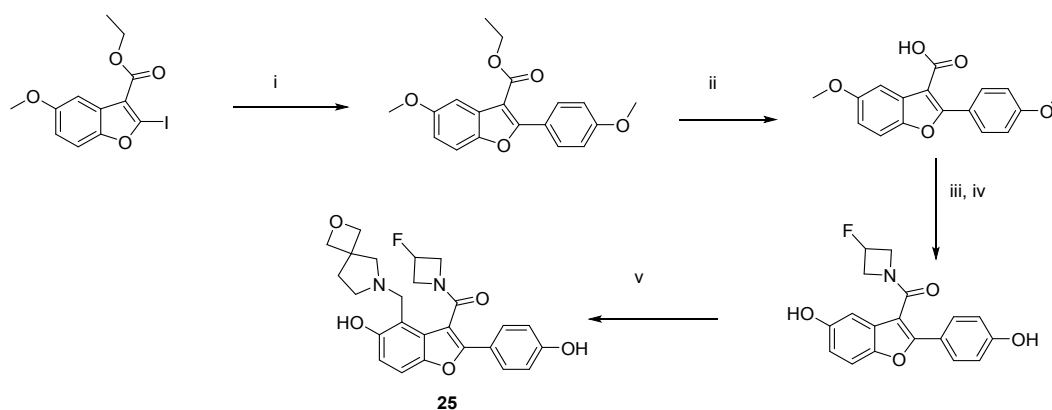

*Reagents and conditions:* (i) (4-methoxyphenyl)boronic acid,  $K_3PO_4$ ,  $Pd(PPh_3)_4$ , dioxane, water, reflux,  $N_2$ ; (ii) NaOH, water, EtOH, 80 °C; (iii) 3-fluoroazetidine hydrochloride, HATU, DIPEA, THF, rt; (iv)  $BBr_3$ , DCM, -78 °C to rt; (v) formaldehyde, 2-oxa-7-azaspiro[3.4]octane; oxalic acid, DIPEA, EtOH,  $H_2O$ , 80 °C.

### Ethyl 5-methoxy-2-(4-methoxyphenyl)benzofuran-3-carboxylate

Ethyl 2-iodo-5-methoxybenzofuran-3-carboxylate (1.5 g, 4.3 mmol), (4-methoxyphenyl)boronic acid (0.790 g, 5.2 mmol),  $K_3PO_4$  (2.3 g, 10.83 mmol) and  $Pd(PPh_3)_4$  (0.250 g, 0.22 mmol) were dissolved in 1,4-dioxane (15 mL) and water (3 mL). Reaction was then heated under reflux conditions under blanket of  $N_2$  for 12 h. Reaction was cooled and water added. Reaction was extracted with DCM (x3). DCM extracts were combined and dried via hydrophobic filter and concentrated under reduced pressure. Product was purified by silica column chromatography (EtOAc 20% gradient elution with Heptane) to give the title compound (0.930 g, 2.7 mmol, 62%). LCMS: Rt m/z 327 [M+H]<sup>+</sup>. <sup>1</sup>H NMR (400 MHz, DMSO)  $\delta$  7.97 (d,  $J=9.0$  Hz, 2H), 7.59 (d,  $J=9.0$  Hz, 1H), 7.46 (d,  $J=2.7$  Hz, 1H), 7.10 (d,  $J=8.9$  Hz, 2H), 7.00 (dd,  $J=2.7, 8.9$  Hz, 1H), 4.34 (q,  $J=7.1$  Hz, 2H), 3.86 - 3.83 (m, 6H), 1.34 (t,  $J=7.1$  Hz, 3H).

### 5-Methoxy-2-(4-methoxyphenyl)benzofuran-3-carboxylic acid

Sodium hydroxide (0.48 g, 12 mmol) in water (6 mL) was added to a solution of ethyl 5-methoxy-2-(4-methoxyphenyl)benzofuran-3-carboxylate (0.75 g, 2.3 mmol) in ethanol (6 mL). Reaction was then heated at 80 °C for 12 h. Reaction was cooled and acidified with 2M HCl and extracted with EtOAc (x3). EtOAc extracts were combined and dried over anhydrous  $Na_2SO_4$  and concentrated under reduced pressure to give the title compound (0.64 g, 2.04 mmol, 61%). LCMS: m/z 299 [M+H]<sup>+</sup>. <sup>1</sup>H NMR (400 MHz, DMSO)  $\delta$  13.01 (s, 1H), 7.98 (d,  $J=8.9$  Hz, 2H), 7.57 (d,  $J=8.9$  Hz, 1H), 7.47 (d,  $J=2.6$  Hz, 1H), 7.09 (d,  $J=8.9$  Hz, 2H), 6.98 (dd,  $J=2.8, 8.9$  Hz, 1H), 3.86 - 3.82 (m, 6H).

### (3-fluoroazetidin-1-yl)(5-hydroxy-2-(4-hydroxyphenyl)benzofuran-3-yl)methanone

To a solution of 5-methoxy-2-(4-methoxyphenyl)benzofuran-3-carboxylic acid (0.250 g, 0.83 mmol) and 3-fluoroazetidine hydrochloride (0.112 g, 1.01 mmol) in THF (5 mL) was added DIPEA (0.325 g, 2.51 mmol) and HATU (0.350 g, 0.92 mmol). Reaction mixture was then stirred at room temperature for 12 h. Water was then added and reaction mixture extracted with EtOAc (x3). EtOAc extracts were combined, washed with brine, dried over anhydrous  $Na_2SO_4$  and concentrated under reduced pressure. Product was purified by silica column chromatography using EtOAc - Heptane 1:1 to give a solid (0.270 g). A solution of the solid (0.270 g, 0.722 mmol) in DCM (7 mL) was cooled to -78 °C under  $N_2$ .  $BBr_3$  (666 mg, 2.65 mmol) was then added dropwise and reaction was allowed to warm to room temperature over 12 h. Saturated  $NaHCO_3$  was then added. DCM was separated and aqueous layer extracted with EtOAc (x3), dried over  $Na_2SO_4$  and concentrated under reduced pressure to give the title compound (0.220 g, 0.605 mmol, 68%). LCMS: m/z 328 [M+H]<sup>+</sup>. <sup>1</sup>H NMR (400 MHz, DMSO)  $\delta$

10.06 (s, 1H), 9.34 (s, 1H), 7.67 (d,  $J=8.8$  Hz, 2H), 7.42 (d,  $J=8.7$  Hz, 1H), 6.95 - 6.90 (m, 3H), 6.77 (dd,  $J=2.5, 8.8$  Hz, 1H), 5.45 - 5.26 (m, 1H), 4.35 - 4.35 (m, 1H), 4.16-3.92 (m, 2H), 3.72-3.57 (m, 1H)

**(4-((2-oxa-6-azaspiro[3.4]octan-6-yl)methyl)-5-hydroxy-2-(4-hydroxyphenyl)benzofuran-3-yl)(3-fluoroazetidin-1-yl)methanone formate (25)**

To a suspension of (3-fluoroazetidin-1-yl)-[5-hydroxy-2-(4-hydroxyphenyl)benzofuran-3-yl]methanone (50 mg, 0.15 mmol) and 2-oxa-7-azaspiro[3.4]octane; oxalic acid (34 mg, 0.16 mmol) in ethanol (1mL) and water (0.2 mL) were successively added DIPEA (29.614mg,0.2291mmol) and formaldehyde 37% solution in water (16.mg, 0.19 mmol) and the mixture was stirred at 80°C for 3 h. Saturated aqueous NaHCO<sub>3</sub> was added and the mixture was extracted with EtOAc, dried and concentrated to afford a residue. Purification by prep HPLC (acidic, 5-50% ACN) gave the title compound (29 mg, 0.05 mmol, 36%). LCMS:  $m/z$  453 [M+H]<sup>+</sup>. <sup>1</sup>H NMR (400 MHz, DMSO)  $\delta$  8.17 (d,  $J=2.8$  Hz, 1H), 7.59 - 7.55 (m, 2H), 7.37 - 7.34 (m, 1H), 6.94 - 6.90 (m, 2H), 6.84 - 6.81 (m, 1H), 5.43-5.18 (m, 1H), 4.48 - 4.45 (m, 5H), 4.12-3.99 (m, 1H) 3.83 (br s, 3H), 3.59 (br s, 1H), 2.83 - 2.80 (m, 2H), 2.66-2.50 (m, 2H), 2.11 - 2.07 (m, 2H).

**Scheme S5**

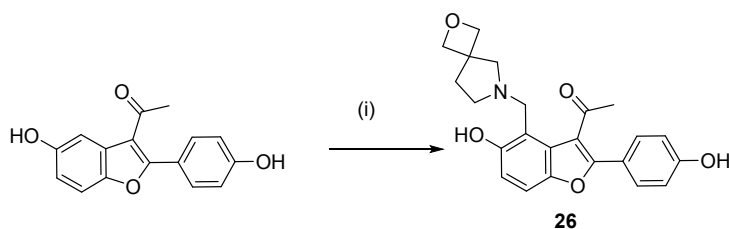

<sup>a</sup>Reagents and conditions: (i) Formaldehyde, 2-oxa-7-azaspiro[3.4]octane; oxalic acid, DIPEA, EtOH, H<sub>2</sub>O, 80 °C.

**1-(4-((2-oxa-6-azaspiro[3.4]octan-6-yl)methyl)-5-hydroxy-2-(4-hydroxyphenyl)benzofuran-3-yl)ethan-1-one formate (26)**

To a solution of 1-[5-hydroxy-2-(4-hydroxyphenyl)benzofuran-3-yl]ethanone (30 mg, 0.11 mmol) and 2-oxa-7-azaspiro[3.4]octane; oxalic acid (24 mg, 0.12 mmol) in ethanol (1 mL) and water (0.2 mL) was added DIPEA (21 mg, 0.16 mmol) and formaldehyde 37% solution in water (11 mg, 0.14 mmol) and the mixture was stirred at 80°C for 6 h. Saturated aqueous NaHCO<sub>3</sub> was added and the mixture was extracted with EtOAc, dried and evaporated. The residue was purified by prep HPLC (acidic, 5-95% ACN) to give the title compound (11 mg, 0.02mmol, 21%). LCMS: Rt  $m/z$  394 [M+H]<sup>+</sup>. <sup>1</sup>H NMR (400 MHz, DMSO)  $\delta$  8.16 (s, 1H), 7.46 (d,  $J=8.7$  Hz, 2H), 7.33 (d,  $J=8.7$  Hz, 1H), 6.91 (d,  $J=8.7$  Hz, 2H), 6.85 (d,  $J=8.8$  Hz, 1H), 4.41 (s, 4H), 3.68 (s, 2H), 2.62 (s, 2H), 2.39 - 2.35 (m, 2H), 2.24 (s, 3H), 1.99 (t,  $J=7.0$  Hz, 2H). HRMS (ESI):  $m/z$  calcd for C<sub>23</sub>H<sub>24</sub>NO<sub>5</sub> [M+H]<sup>+</sup>: 394.1654. Found 394.1726.

**Scheme S6**

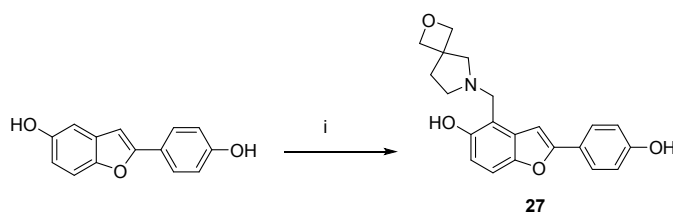

<sup>a</sup>Reagents and conditions: (i) Formaldehyde, 2-oxa-7-azaspiro[3.4]octane; oxalic acid, EtOH, H<sub>2</sub>O, 80°C.

#### 4-((2-oxa-6-azaspiro[3.4]octan-6-yl)methyl)-2-(4-hydroxyphenyl)benzofuran-5-ol (27)

A mixture of 2-oxa-7-azaspiro[3.4]octane; oxalic acid (98 mg, 0.48 mmol), 2-(4-hydroxyphenyl)benzofuran-5-ol (100 mg, 0.44 mmol), formaldehyde 37% solution in water (46 mg, 0.57 mmol), in ethanol (3 mL) was heated at 80°C overnight. The cooled reaction mixture was treated with saturated NaHCO<sub>3</sub> (10ml), extracted with EtOAc (2 x 20 ml). The combined EtOAc extracts were evaporated in vacuo and half of the residue was purified by mass directed HPLC (basic, 5-95% ACN) to give the title compound (17 mg, 0.04 mmol, 9%) as a white solid. LCMS: m/z 352 [M+H]<sup>+</sup>. <sup>1</sup>H NMR (400 MHz, DMSO) δ 9.96 - 9.82 (br s, 2H), 7.71 - 7.68 (m, 2H), 7.29 - 7.27 (m, 1H), 7.17 - 7.17 (m, 1H), 6.88 - 6.85 (m, 2H), 6.69 - 6.67 (m, 1H), 4.52 - 4.46 (m, 4H), 3.93 - 3.91 (m, 2H), 2.88 - 2.86 (m, 2H), 2.62 - 2.57 (m, 2H), 2.10 (t, J=6.7 Hz, 2H). HRMS (ESI): m/z calcd for C<sub>22</sub>H<sub>22</sub>NO<sub>4</sub> [M+H]<sup>+</sup>: 352.1549. Found 352.1560.

#### Scheme S7

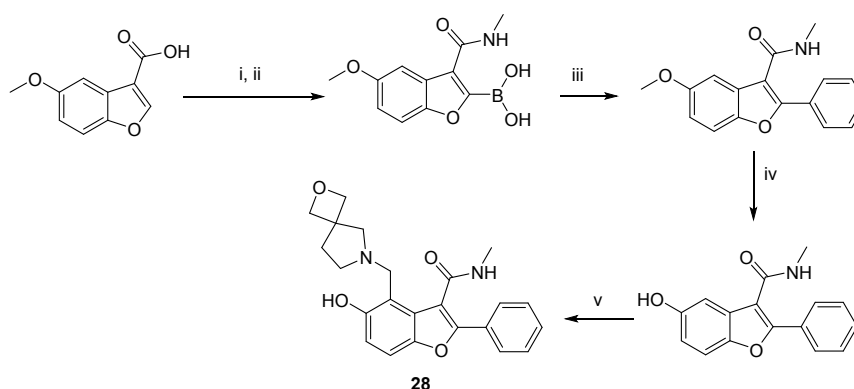

<sup>a</sup>Reagents and conditions: (i) methanamine hydrochloride, EDCI, Pyridine, 30 °C; (ii) trimethyl borate, LDA, THF, -78°C; (iii) bromobenzene, K<sub>2</sub>CO<sub>3</sub>, Pd(dppf)Cl<sub>2</sub>, dioxane, water, 80 °C; (iv) pyridine hydrochloride, microwave, 180 °C; (v) formaldehyde, 2-oxa-7-azaspiro[3.4]octane; oxalic acid, EtOH, H<sub>2</sub>O, 80 °C.

#### (5-methoxy-3-(methylcarbamoyl)benzofuran-2-yl)boronic acid

A solution of 5-methoxybenzofuran-3-carboxylic acid (94.00 g, 489.15 mmol) methanamine;hydrochloride (46.38 g, 686.89 mmol) and EDCI (219.46 g, 1.14 mol) in pyridine (1.0 L) was stirred at 30 °C for 16 h. The reaction was poured into water (2 L) and stirred for 15 min. The aqueous phase was extracted with ethyl acetate (300 mL x 5). The combined organic phase was washed with brine (300 mL x 2), dried over anhydrous Na<sub>2</sub>SO<sub>4</sub>, filtered and concentrated under vacuum to give crude product. The residue solid was purified through slurry in MTBE/PE=5/1 (600 ml) to give a white solid (67.00 g). To a solution the white solid (67.00 g, 326.30 mmol) and trimethyl borate (135.62 g, 1.30 mol) in THF (600 mL) was added LDA (2 M, 685.23 mL) drop-wise at -78 °C under N<sub>2</sub>. The reaction was stirred at -78 °C for 2 h. The reaction mixture was poured into aqueous HCl solution (2 M, 1.5 L). The solid was collected, washed with water (500 mL x 3) and dried under vacuum to give the title compound (81.0 g, 326.65 mmol, 99%) as a white solid. LCMS: m/z 250 [M+H]<sup>+</sup>. <sup>1</sup>H NMR (400MHz, DMSO) δ 8.54 (d, J=4.4 Hz, 1H), 7.59 (d, J=8.8 Hz, 1H), 7.43 (d, J=2.4 Hz, 1H), 7.07-7.04 (m, 1H), 3.85 (s, 3H), 2.91 (d, J=4.8 Hz, 3H).

#### 5-methoxy-N-methyl-2-phenylbenzofuran-3-carboxamide

Potassium carbonate (1.665 g, 12 mmol), Pd(dppf)Cl<sub>2</sub> (327 mg, 0.40 mmol), bromobenzene (630 mg, 4.0156mmol) and [5-methoxy-3-(methylcarbamoyl)benzofuran-2-yl]boronic acid (1 g, 4.01 mmol) were mixed in water (4 mL) / 1,4-dioxane (20 mL) and the reaction mixture was degassed by



bubbling N<sub>2</sub> through the reaction mixture for 10mins and purged with N<sub>2</sub>. The reaction mixture was heated at 80 °C for 3 h. The reaction mixture was cooled and quenched with water (10 ml) and then extracted with EtOAc. (2 x 15 ml) and evaporated in vacuo and the residue purified by silica (40g) eluting with 0-50% EtOAc/ heptane to give the title compound (640 mg, 2.16 mmol, 53%) as a brown solid. LCMS: m/z 282 [M+H]<sup>+</sup>. <sup>1</sup>H NMR (500 MHz, DMSO) δ 8.45 - 8.40 (m, 1H), 7.89 - 7.86 (m, 2H), 7.60 - 7.46 (m, 4H), 7.09 (d, J=2.6 Hz, 1H), 6.99 (dd, J=2.6, 8.9 Hz, 1H), 3.82 (s, 3H), 2.85 - 2.84 (m, 3H).

#### 5-hydroxy-N-methyl-2-phenylbenzofuran-3-carboxamide

A mixture of 5-methoxy-N-methyl-2-phenyl-benzofuran-3-carboxamide (240 mg, 0.85 mmol), pyridine hydrochloride (492 mg, 4.26 mmol) was heated at 180 °C in the microwave for 30 mins. The reaction mixture was purified by SCX (10g) and eluted with MeOH. The MeOH fractions were evaporated in vacuo. The solid was purified by silica (12 g, 0-100% EtOAc/heptane) to give the title compound as a light brown solid (72 mg, 0.25 mmol, 29%). LCMS: m/z 268 [M+H]<sup>+</sup>. <sup>1</sup>H NMR (400 MHz, DMSO) δ 9.36 (s, 1H), 8.39 (m, 1H), 7.85 (d, J=7.2 Hz, 2H), 7.53 - 7.42 (m, 4H), 6.94 (d, J=2.3 Hz, 1H), 6.82 (dd, J=2.5, 8.8 Hz, 1H), 2.83 - 2.81 (m, 3H).

#### 4-((2-oxa-6-azaspiro[3.4]octan-6-yl)methyl)-5-hydroxy-N-methyl-2-phenylbenzofuran-3-carboxamide (28)

A mixture of 5-hydroxy-N-methyl-2-phenyl-benzofuran-3-carboxamide (50 mg, 0.18 mmol) 2-oxa-7-azaspiro[3.4]octane; oxalic acid (57 mg, 0.28 mmol) in ethanol (2 mL) and water (0.4 mL) was treated with DIPEA (79 mg, 0.61 mmol) and formaldehyde 37% solution in water (106 mg, 1.30 mmol) and heated at 80°C overnight. The cooled reaction mixture was evaporated in vacuo and the residue purified by mass directed HPLC (basic, 5-95% ACN) to give the title compound (38 mg, 0.09 mmol, 49%) as a yellow glassy solid. LCMS: m/z 393 [M+H]<sup>+</sup>. <sup>1</sup>H NMR (500 MHz, DMSO) δ 10.66 (s, 1H), 8.63 - 8.58 (m, 1H), 7.76 - 7.74 (m, 2H), 7.53 - 7.49 (m, 2H), 7.46 - 7.40 (m, 2H), 6.82 - 6.80 (m, 1H), 4.50 - 4.46 (m, 4H), 3.86 (s, 2H), 2.83 - 2.77 (m, 5H), 2.58-2.53 (m, 2H), 2.11-2.06 (m, 2H). HRMS (ESI): m/z calcd for C<sub>23</sub>H<sub>25</sub>N<sub>2</sub>O<sub>4</sub> [M+H]<sup>+</sup>: 393.1814. Found 393.1616.

#### Scheme S8

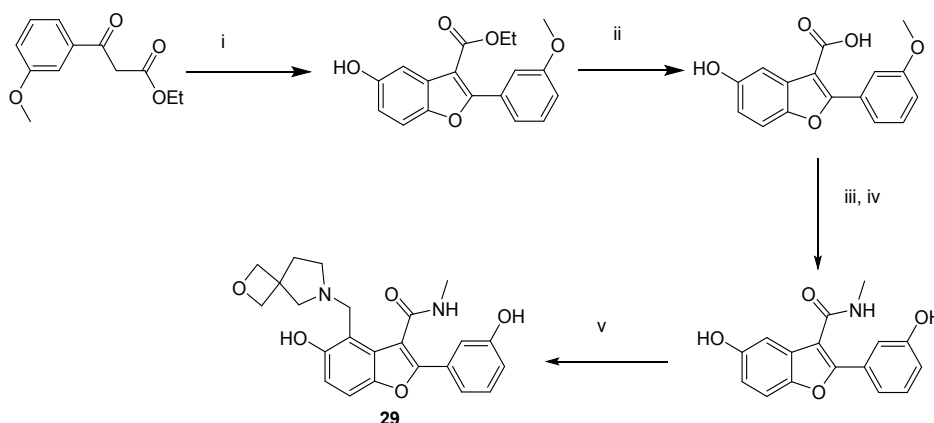

<sup>a</sup>Reagents and conditions: (i) 1,4-benzoquinone, ZnCl<sub>2</sub>, toluene, 110 °C ; (ii) NaOH, EtOH, H<sub>2</sub>O, 50 °C; (iii) methanamine hydrochloride, HOBt, EDCl, DIPEA, DMF, 15 °C; (iv) BBr<sub>3</sub>, DCM, 0 °C to 15 °C; (v) formaldehyde, 2-oxa-7-azaspiro[3.4]octane; oxalic acid, dioxane, H<sub>2</sub>O, 80 °C.

#### ethyl 5-hydroxy-2-(3-methoxyphenyl)benzofuran-3-carboxylate

To a mixture of ethyl 3-(3-methoxyphenyl)-3-oxopropanoate (17.50 g, 78.74 mmol) and 1, 4-benzoquinone (9.36 g, 86.61 mmol, 19.50 mL) in toluene (175 mL) was added ZnCl<sub>2</sub> (11.81 g, 86.61

mmol, 4.06 mL) in one portion at 15 °C. The mixture was stirred at 110 °C for 16 h. The reaction mixture was concentrated under reduced pressure to remove solvent. The residue was diluted with water (100 mL) and extracted with ethyl acetate (50 mL x 3). The combined organic layers were washed with brine (50 mL), dried over anhydrous Na<sub>2</sub>SO<sub>4</sub>, filtered and concentrated under reduced pressure to give a residue. The residue was purified by column chromatography (SiO<sub>2</sub>, Petroleum ether/Ethyl acetate=30/1 to 1/1) to give the title compound as a yellow oil. (10.00 g, 28.82 mmol, 36% ) LCMS: m/z 313 [M+H]<sup>+</sup>. <sup>1</sup>H NMR (400 MHz, DMSO) δ 9.48 (s, 1H), 7.53 - 7.50 (m, 3H), 7.49 - 7.48 (m, 1H), 7.43 - 7.36 (d, 1H), 7.15 - 7.05 (m, 1H), 6.86 - 6.84 (d, 1H), 4.34 - 4.28 (m, 2H), 3.82 (s, 3H), 1.32 - 1.29 (t, 3H)

#### **5-hydroxy-2-(3-methoxyphenyl)benzofuran-3-carboxylic acid**

To a solution of ethyl 5-hydroxy-2-(3-methoxyphenyl)benzofuran-3-carboxylate (10.00 g, 32.02 mmol) in EtOH (50 mL) was added a solution of NaOH (3.84 g, 96.06 mmol) in H<sub>2</sub>O (50 mL) at 15 °C. The mixture was stirred at 50 °C for 16 h. The reaction mixture was concentrated under reduced pressure. The residue was diluted with water (300 mL), acidified with conc. HCl until pH =4~5 and extracted with ethyl acetate (100 mL \* 3). The combined organic layers were washed with brine (150 mL), dried over anhydrous Na<sub>2</sub>SO<sub>4</sub>, filtered and concentrated under reduced pressure to give a residue. The residue was purified by re-crystallization from MTBE (100 mL) to give the title compound as a light yellow solid. (8.50 g, 28.71mmol, 89%) LCMS: m/z 307 [M+Na]<sup>+</sup>. <sup>1</sup>H NMR (400 MHz, DMSO) δ 7.62 (s, 1H), 7.53 - 7.46 (d, 1H), 7.44 - 7.39 (m, 3H), 7.07 - 7.04 (m, 1H), 6.84 - 6.81 (m, 1H), 3.81 (s, 3H)

#### **5-hydroxy-2-(3-hydroxyphenyl)-N-methylbenzofuran-3-carboxamide**

To a mixture of compound 5-hydroxy-2-(3-methoxyphenyl)benzofuran-3-carboxylic acid (1.90 g, 6.68 mmol), HOBT (1.35 g, 10.03 mmol) and EDCI (1.92 g, 10.03 mmol) in DMF (19 mL) was added methanamine hydrochloride (676 mg, 10.03 mmol) and DIPEA (2.59 g, 20.05 mmol, 3.50 mL) at 0 °C. The mixture was stirred at 15 °C for 12 h. The mixture was diluted with water (60 mL) and extracted with ethylacetate (30 mL x 3). The combined organic layers were washed with brine (30 mL), dried over anhydrous Na<sub>2</sub>SO<sub>4</sub>, filtered and concentrated under reduced pressure to give a brown solid (2.00g, crude). To a solution of the brown solid (2.00 g, 6.73 mmol) in DCM (20 mL) was added BBr<sub>3</sub> (5.06 g, 20.19 mmol, 1.95 mL) at 0 °C under N<sub>2</sub>. The mixture was stirred at 15 °C for 4 h. The reaction solution was quenched by aqueous NaHCO<sub>3</sub> (20 mL), then adjusted to pH of 4~5 with conc. HCl and filtered. The filtered cake was washed with water (20 mL), dried in vacuum to give the title compound as a brown solid (1.70 g, 5.10 mmol, 76%, 85% purity). LCMS: m/z 284 [M+H]<sup>+</sup>. <sup>1</sup>H NMR (400 MHz, DMSO) δ 8.38 - 8.37 (q, 1H), 7.45 - 7.42 (d, 1H), 7.29 - 7.26 (m, 3H), 6.90 - 6.89 (d, 1H), 6.83 - 6.80 (m, 2H), 2.81 - 2.80 (d, 3H)

#### **4-((2-oxa-6-azaspiro[3.4]octan-6-yl)methyl)-5-hydroxy-2-(3-hydroxyphenyl)-N-methylbenzofuran-3-carboxamide formate (29)**

To a solution of 5-hydroxy-2-(3-hydroxyphenyl)-N-methylbenzofuran-3-carboxamide (100 mg, 353 μmol) and formaldehyde 37% solution in water (31 mg, 388 μmol, 28 μL) in dioxane (1.5 mL) and H<sub>2</sub>O (0.5 mL) was added 2-oxa-6-azaspiro[3.4]octane oxalic acid (86 mg, 423 μmol). The reaction mixture was stirred at 80 °C for 30 h. The reaction mixture was concentrated under reduced pressure. The residue was purified by prep-HPLC (Formic Acid condition) to give the title compound (15 mg, 32 μmol, 9%) as a brown solid. LCMS: m/z 409 [M+H]<sup>+</sup>. <sup>1</sup>H NMR (400 MHz, DMSO) δ 8.59 (q, J=4.6 Hz, 1H), 8.19 (s, 1H), 7.41 - 7.37 (m, 1H), 7.28 (t, J=8.2 Hz, 1H), 7.20 - 7.16 (m, 2H), 6.83 - 6.78 (m, 2H), 4.51 - 4.46 (m, 4H), 3.85 (s, 2H), 2.84 - 2.77 (m, 5H), 2.59-2.53 (m, 2H), 2.09 (t, J=7.1 Hz, 2H).

## Scheme S9

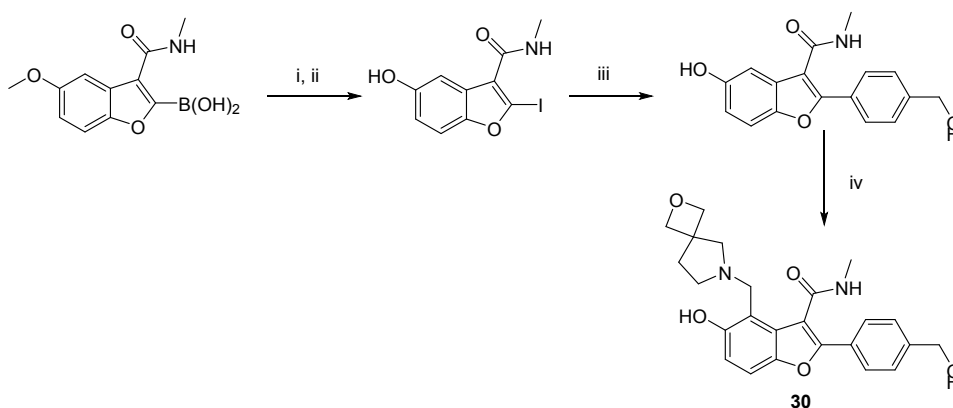

<sup>a</sup>Reagents and conditions: (i) NIS, DMF, 25 °C; (ii) BBr<sub>3</sub>, DCM, 0 °C; (iii) [4-(hydroxymethyl)phenyl]boronic acid, K<sub>3</sub>PO<sub>4</sub>, Pd(PPh<sub>3</sub>)<sub>4</sub>, dioxane, water, N<sub>2</sub>, 100 °C; (iv) formaldehyde, 2-oxa-7-azaspiro[3.4]octane; oxalic acid, EtOH, H<sub>2</sub>O, 80 °C.

### 5-hydroxy-2-iodo-N-methylbenzofuran-3-carboxamide

A mixture of (5-methoxy-3-(methylcarbamoyl)benzofuran-2-yl)boronic acid (81.00 g, 321.25 mmol) and NIS (79.50 g, 353.38 mmol) in DMF (800 mL) under N<sub>2</sub> was stirred at 25 °C for 16 h. The reaction mixture was poured into water (1.5 L). The solid was collected, washed with H<sub>2</sub>O (200 mL x 3) and dried in vacuum to afford 2-iodo-5-methoxy-N-methylbenzofuran-3-carboxamide (60.00 g, 181.21 mmol, 56%) as a white solid. To a solution of 2-iodo-5-methoxy-N-methylbenzofuran-3-carboxamide (40.00 g, 120.81 mmol) in DCM (400 mL) was added BBr<sub>3</sub> (121.06 g, 483.24 mmol, 46.56 mL) dropwise at 0 °C under N<sub>2</sub>. The reaction was stirred at 30 °C for 12 h. The reaction solution was quenched with EtOH (20 mL) at 0 °C. The mixture was filtered, the filter cake was washed with H<sub>2</sub>O (50 mL x 3) and dried in vacuum to afford the title compound (38.00 g, 119.84 mmol, 99%) as a white solid. LCMS: m/z 318 [M+H]<sup>+</sup>. <sup>1</sup>H NMR (400 MHz, DMSO) δ 9.42 (s, 1H), 8.04 (d, J=4.3 Hz, 1H), 7.43 (d, J=9.0 Hz, 1H), 7.04 (d, J=2.4 Hz, 1H), 6.75 (dd, J=2.4, 8.9 Hz, 1H), 2.81 (d, J=4.6 Hz, 3H).

### 5-hydroxy-2-(4-(hydroxymethyl)phenyl)-N-methylbenzofuran-3-carboxamide

A mixture of 5-hydroxy-2-iodo-N-methylbenzofuran-3-carboxamide (200 mg, 0.63 mmol), Pd(PPh<sub>3</sub>)<sub>4</sub> (36 mg, 0.03 mmol), K<sub>3</sub>PO<sub>4</sub> (334 mg, 1.57 mmol) and [4-(hydroxymethyl)phenyl]boronic acid (115 mg, 0.75 mmol) in 1,4-dioxane (4 mL) and water (0.8 mL) was degassed under N<sub>2</sub> for 5 min and then heated at 100 °C for 2 h. Water was added and the mixture was extracted with EtOAc (x3), dried and concentrated to give a residue, which was purified by silica column chromatography (50-100% EtOAc in heptane) to give the title compound (94 mg, 0.30 mmol, 47%). LCMS: m/z 298 [M+H]<sup>+</sup>. <sup>1</sup>H NMR (400 MHz, DMSO) δ 9.35 (s, 1H), 8.35 (d, J=4.6 Hz, 1H), 7.83 - 7.79 (m, 2H), 7.44 (m, 3H), 6.93 (d, J=2.2 Hz, 1H), 6.80 (dd, J=2.3, 8.8 Hz, 1H), 5.30 (t, J=5.7 Hz, 1H), 4.56 (d, J=5.7 Hz, 2H), 2.81 (d, J=4.6 Hz, 3H).

### 4-((2-oxa-6-azaspiro[3.4]octan-6-yl)methyl)-5-hydroxy-2-(4-(hydroxymethyl)phenyl)-N-methylbenzofuran-3-carboxamide (30)

To a solution of 5-hydroxy-2-(4-(hydroxymethyl)phenyl)-N-methylbenzofuran-3-carboxamide (40 mg, 0.13 mmol) and 2-oxa-7-azaspiro[3.4]octane; oxalic acid (30 mg, 0.14 mmol) in ethanol (1 mL) and water (0.2 mL) was added DIPEA (22 mg, 0.17 mmol) and formaldehyde 37% solution in water (13 mg, 0.16 mmol) and the mixture was stirred at 80 °C overnight. Saturated aqueous NaHCO<sub>3</sub> was added and the mixture was extracted with EtOAc, dried and concentrated to afford a residue. Purification by prep HPLC (basic, 5-95% ACN) gave the title compound (12 mg, 0.02 mmol, 20%). LCMS: m/z 423 [M+H]<sup>+</sup>. <sup>1</sup>H NMR (400 MHz, DMSO) δ 8.59 (q, J=4.5 Hz, 1H), 7.71 - 7.68 (m, 2H), 7.46 - 7.38 (m, 3H), 6.81 - 6.78

(m, 1H), 5.34 - 5.29 (m, 1H), 4.57 - 4.45 (m, 6H), 3.86 (s, 2H), 2.84 - 2.76 (m, 5H), 2.59-2.52 (m, 2H), 2.12 - 2.06 (m, 2H).

#### Scheme S10

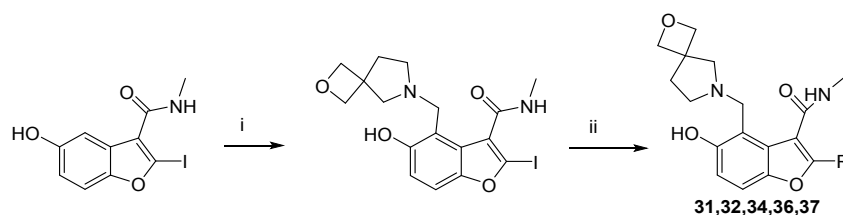

<sup>a</sup>Reagents and conditions: (i) Formaldehyde, 2-oxa-7-azaspiro[3.4]octane oxalic acid, EtOH, water, 60 °C; (ii) Boronic acid, K<sub>3</sub>PO<sub>4</sub>, Pd(dppf)Cl<sub>2</sub>, dioxane, water, 80 °C, N<sub>2</sub>, or boronic acid, Na<sub>2</sub>CO<sub>3</sub>, Pd(dppf)Cl<sub>2</sub>, dioxane, water, microwave, 120 °C, N<sub>2</sub>.

#### 4-((2-oxa-6-azaspiro[3.4]octan-6-yl)methyl)-5-hydroxy-2-iodo-N-methylbenzofuran-3-carboxamide

A solution of 5-hydroxy-2-iodo-N-methylbenzofuran-3-carboxamide (5.00 g, 15.77 mmol), 2-oxa-7-azaspiro[3.4]octane oxalic acid (3.52 g, 17.35 mmol) and formaldehyde (1.41 g, 17.35 mmol, 1.29 mL, 37% solution in water) in EtOH (100.00 mL) and H<sub>2</sub>O (20.00 mL) was stirred at 60 °C for 40 h. The reaction was concentrated under vacuum. The residue was purified by re-crystallization from MeOH/EtOAc (1/1, 10 mL) to get crude product (3.10 g) as a white solid. The combined crude product (16 g, 5 batches) was purified by re-crystallization from MeOH/EtOAc/H<sub>2</sub>O (1/1/1, 20 mL) to give the title compound (11.00 g, 23.63 mmol, 65%) as a white solid. LCMS: m/z 443 [M+H]<sup>+</sup>. <sup>1</sup>H NMR: (400 MHz, MeOD) δ 8.67 (d, J=4.8 Hz, 1H), 7.54 (d, J=9.2 Hz, 1H), 6.97 (d, J=9.6 Hz, 1H), 4.56-4.55 (m, 2H), 4.48-4.47 (m, 2H), 4.26 (s, 2H), 3.48 (s, 2H), 3.21 (s, 2H), 2.85 (d, J=4.8 Hz, 3H), 2.32-2.28 (m, 2H).

**General Procedure A:** A mixture of 5-hydroxy-2-iodo-N-methyl-4-(2-oxa-7-azaspiro[3.4]octan-7-ylmethyl)benzofuran-3-carboxamide (96 mg, 0.21 mmol), K<sub>3</sub>PO<sub>4</sub> (115 mg, 0.54 mmol), the corresponding boronic acid (32 mg, 0.21 mmol), in 1,4-dioxane (4 mL) and water (1 mL) was degassed for 10 mins. Pd(dppf)Cl<sub>2</sub> (14 mg, 0.018 mmol) was added, the flask flushed with nitrogen and the reaction mixture heated at 80 °C for 2 h. The cooled reaction mixture was partitioned between water (5 mL) and extracted with EtOAc (2 x 10 mL) or DCM and evaporated in vacuo. The residue purified by mass directed HPLC (acidic, 5-95% ACN).

#### 4-((2-oxa-6-azaspiro[3.4]octan-6-yl)methyl)-5-hydroxy-2-(4-methoxyphenyl)-N-methylbenzofuran-3-carboxamide formate (31)

Prepared using general procedure A starting from (4-methoxyphenyl)boronic acid (32 mg, 0.21 mmol) to give the title compound (60 mg, 0.12 mmol, 56%) as a white solid. LCMS: m/z 423 [M+H]<sup>+</sup>. <sup>1</sup>H NMR (400 MHz, DMSO) δ 8.57 (q, J=4.6 Hz, 1H), 8.16 (s, 1H), 7.70 - 7.67 (m, 2H), 7.39 - 7.36 (m, 1H), 7.09 - 7.06 (m, 2H), 6.79 - 6.76 (m, 1H), 4.51 - 4.46 (m, 4H), 3.86 (s, 2H), 3.82 (s, 3H), 2.85 (s, 2H), 2.77 (d, J=4.7 Hz, 3H), 2.59-2.54 (m, 2H), 2.12-2.07 (m, 2H). HRMS (ESI): m/z calcd for C<sub>24</sub>H<sub>27</sub>N<sub>2</sub>O<sub>5</sub> [M+H]<sup>+</sup>: 423.1920. Found 423.1964.

#### 4-((2-oxa-6-azaspiro[3.4]octan-6-yl)methyl)-5-hydroxy-2-(1H-indol-5-yl)-N-methylbenzofuran-3-carboxamide (32)

Prepared using general procedure A starting from 5-(4,4,5,5-tetramethyl-1,3,2-dioxaborolan-2-yl)-1H-indole (54 mg, 0.22 mmol), 5-hydroxy-2-iodo-N-methyl-4-(2-oxa-7-azaspiro[3.4]octan-7-ylmethyl)benzofuran-3-carboxamide (100 mg, 0.22 mmol) and K<sub>3</sub>PO<sub>4</sub> (143 mg, 0.67 mmol) and

Pd(dppf)Cl<sub>2</sub> (18 mg, 0.02 mmol). Purification by prep HPLC (XBridge column, 0.1% NH<sub>4</sub>OH modifier) gave the title compound as a white solid (50mg, 0.11mmol, 48%). LCMS: m/z 432 [M+H]. <sup>1</sup>H NMR (400 MHz, DMSO) δ 11.31 (s, 1H), 8.53 (q, *J*=4.5 Hz, 1H), 7.98 - 7.97 (m, 1H), 7.50 (s, 2H), 7.44 - 7.36 (m, 2H), 6.76 - 6.73 (m, 1H), 6.54 (d, *J*=2.0 Hz, 1H), 4.51 - 4.46 (m, 4H), 3.87 (s, 2H), 2.84 (s, 2H), 2.79 - 2.77 (m, 3H), 2.59-2.54 (m, 2H), 2.13 - 2.08 (m, 2H). HRMS (ESI): m/z calcd for C<sub>25</sub>H<sub>26</sub>N<sub>3</sub>O<sub>4</sub> [M+H<sup>+</sup>]: 432.1923. Found 432.1891.

#### **2-(3-fluoro-4-hydroxy-phenyl)-5-hydroxy-2-*N*-methyl-4-(2-oxa-7-azaspiro[3.4]octan-7-ylmethyl)benzofuran-3-carboxamide (34)**

To a solution of 5-hydroxy-2-iodo-*N*-methyl-4-(2-oxa-7-azaspiro[3.4]octan-7-ylmethyl)benzofuran-3-carboxamide (150 mg, 0.34 mmol) in 1,4-dioxane (4 mL) and water (0.5 mL) was added sodium carbonate (72 mg, 0.68 mmol). Nitrogen was bubbled through the suspension for 5 mins, after which 3-fluoro-4-hydroxyphenylboronic acid (79 mg, 0.51 mmol) and [1,1'-Bis(diphenylphosphino)ferrocene]dichloropalladium(II) (12 mg, 0.02 mmol) were added. The reaction was heated by microwave irradiation at 120 °C for 1 h. Water was added and the mixture was extracted three times with CH<sub>2</sub>Cl<sub>2</sub> and filtered through a phase separator. The filtrate was reduced *in vacuo* and the residue was purified by preparative HPLC (basic, 0-95% ACN). Further purification carried out by HPLC (basic, 0-50% ACN) to give the title compound (27 mg, 0.06 mmol, 18%). LCMS: m/z 427 [M+H]<sup>+</sup>. <sup>1</sup>H NMR (400 MHz, DMSO) δ 10.52 (br s, 2H), 8.59 (q, *J*=4.5 Hz, 1H), 7.48 - 7.34 (m, 3H), 7.06 (t, *J*=8.8 Hz, 1H), 6.79 - 6.75 (m, 1H), 4.50 - 4.45 (m, 4H), 3.83 (s, 2H), 2.83 - 2.77 (m, 5H), 2.57-2.52 (m, 2H), 2.11 - 2.06 (m, 2H). HRMS (ESI): m/z calcd for C<sub>23</sub>H<sub>24</sub>N<sub>2</sub>O<sub>5</sub>F [M+H<sup>+</sup>]: 427.1669. Found 427.1772.

#### **4-((2-oxa-6-azaspiro[3.4]octan-6-yl)methyl)-2-(2,6-difluoro-4-hydroxyphenyl)-5-hydroxy-*N*-methylbenzofuran-3-carboxamide formate (36)**

Using general procedure A starting from 5-hydroxy-2-iodo-*N*-methyl-4-(2-oxa-7-azaspiro[3.4]octan-7-ylmethyl)benzofuran-3-carboxamide (100 mg, 0.22 mmol), (2,6-difluoro-4-hydroxy-phenyl)boronic acid (39 mg, 0.22 mmol), Pd(dppf)Cl<sub>2</sub> (18 mg, 0.02 mmol) and K<sub>3</sub>PO<sub>4</sub> (48 mg, 0.22 mmol) in 1,4-dioxane (1.6 mL) and water (0.4 mL). Purification by prep LCMS (XBridge column, 0.1% formic acid modifier, 5-95% MeCN in H<sub>2</sub>O) gave the title compound as a brown solid (25 mg, 0.05 mmol, 21%). LCMS: m/z 445 [M+H]<sup>+</sup>. <sup>1</sup>H NMR (400 MHz, DMSO) δ 8.18 - 8.16 (m, 2H), 7.38 (d, *J*=8.8 Hz, 1H), 6.85 (d, *J*=8.9 Hz, 1H), 6.59 (d, *J*=10.0 Hz, 2H), 4.47 - 4.43 (m, 4H), 3.97 (s, 2H), 2.84 (s, 2H), 2.65 (d, *J*=4.6 Hz, 3H), 2.59 - 2.54 (m, 2H), 2.07 (m, 2H). HRMS (ESI): m/z calcd for C<sub>23</sub>H<sub>23</sub>N<sub>2</sub>O<sub>5</sub>F<sub>2</sub> [M+H<sup>+</sup>]: 445.1575. Found 445.1564.

#### **4-((2-oxa-6-azaspiro[3.4]octan-6-yl)methyl)-5-hydroxy-2-(4-hydroxy-3-methylphenyl)-*N*-methylbenzofuran-3-carboxamide (37)**

Using general procedure A starting from 5-hydroxy-2-iodo-*N*-methyl-4-(2-oxa-7-azaspiro[3.4]octan-7-ylmethyl)benzofuran-3-carboxamide (82 mg, 0.18 mmol), (4-hydroxy-3-methyl-phenyl)boronic acid (28 mg, 0.18 mmol), Pd(dppf)Cl<sub>2</sub> (15 mg, 0.01 mmol) and K<sub>3</sub>PO<sub>4</sub> (118 mg, 0.55 mmol) in dioxane (2 mL) and water (0.5 mL). Purification by prep LCMS (XBridge column, 0.1% NH<sub>4</sub>OH modifier, 5-95% MeCN in H<sub>2</sub>O) gave the title compound as a brown solid (47 mg, 0.10 mmol, 57%). LCMS: m/z 423 [M+H]<sup>+</sup>. <sup>1</sup>H NMR (400 MHz, DMSO) δ 8.49 (q, *J*=4.6 Hz, 1H), 7.45 (d, *J*=1.7 Hz, 1H), 7.40 - 7.31 (m, 2H), 6.87 - 6.83 (m, 1H), 6.73 - 6.70 (m, 1H), 4.50 - 4.44 (m, 4H), 3.83 (s, 2H), 3.17 (s, 1H), 2.82 - 2.74 (m, 5H), 2.57-2.50 (m, 2H), 2.16 (s, 3H), 2.08 (t, *J*=7.2 Hz, 2H). HRMS (ESI): m/z calcd for C<sub>24</sub>H<sub>27</sub>N<sub>2</sub>O<sub>5</sub> [M+H<sup>+</sup>]: 423.1920. Found 423.2954.

### Scheme S11

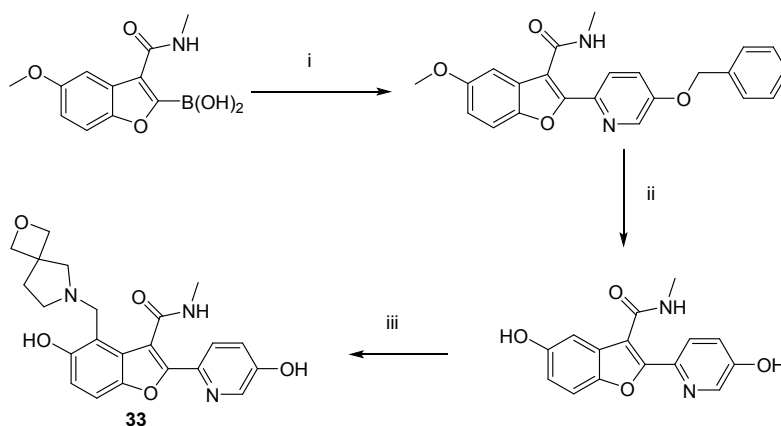

*Reagents and conditions:* (i) 5-benzyloxy-2-bromo-pyridine, K<sub>2</sub>CO<sub>3</sub>, Pd(dppf)Cl<sub>2</sub>, dioxane, water, 80 °C; (ii) BBr<sub>3</sub>, DCM, -78 °C to rt; (iii) formaldehyde, 2-oxa-7-azaspiro[3.4]octane oxalic acid, EtOH, water, reflux.

#### 2-(5-(benzyloxy)pyridin-2-yl)-5-methoxy-N-methylbenzofuran-3-carboxamide

(5-methoxy-3-(methylcarbamoyl)benzofuran-2-yl)boronic acid (0.4 g, 1.61 mmol), 5-benzyloxy-2-bromo-pyridine (0.424 g, 1.61 mmol), potassium carbonate (0.444 g, 3.21 mmol) and Pd(dppf)Cl<sub>2</sub> (0.132 g, 0.16 mmol) were added to 1,4-dioxane (8 mL) and water (2 mL). Reaction vessel was degassed and purged with N<sub>2</sub> then heated at 80 °C for 2 h. Reaction was cooled then water added and extracted with EtOAc. The EtOAc extracts were combined and washed with brine, dried over anhydrous Na<sub>2</sub>SO<sub>4</sub> and concentrated under reduced pressure. Product was purified by silica column chromatography using 10% EtOAc – Heptane to give the title compound (0.37 g, 0.90 mmol, 56%). LCMS: m/z 389 [M+H]<sup>+</sup>. <sup>1</sup>H NMR (400 MHz, DMSO) δ 10.79 (d, J=4.5 Hz, 1H), 8.62 (d, J=2.8 Hz, 1H), 8.12 - 8.09 (m, 1H), 7.79 - 7.75 (m, 2H), 7.59 - 7.38 (m, 6H), 7.01 (dd, J=2.7, 8.9 Hz, 1H), 5.33 (s, 2H), 3.82 (s, 3H), 2.90 (d, J=4.7 Hz, 3H).

#### 5-hydroxy-2-(5-hydroxypyridin-2-yl)-N-methylbenzofuran-3-carboxamide

2-(5-(benzyloxy)pyridin-2-yl)-5-methoxy-N-methylbenzofuran-3-carboxamide (0.25 g, 0.64 mmol) was added to DCM (6 mL) and cooled to -78 °C under N<sub>2</sub>. BBr<sub>3</sub> (0.806 g, 3.21 mmol) was then added slowly and reaction warmed to room temperature over 12 h. Saturated NaHCO<sub>3</sub> was then added and DCM layer separated. Aqueous NaHCO<sub>3</sub> was extracted with EtOAc (x3). Organic extracts were combined, dried over anhydrous Na<sub>2</sub>SO<sub>4</sub> and concentrated under reduced pressure to give the title compound (0.175 g, 0.55 mmol, 86%). LCMS: m/z 285 [M+H]<sup>+</sup>. <sup>1</sup>H NMR (400 MHz, DMSO) δ 10.93 - 10.91 (m, 1H), 10.77 (s, 1H), 9.32 (s, 1H), 8.34 (d, J=2.8 Hz, 1H), 8.01 - 7.98 (m, 1H), 7.66 (d, J=2.6 Hz, 1H), 7.47 - 7.41 (m, 2H), 6.82 (dd, J=2.5, 8.8 Hz, 1H), 2.88 (d, J=4.5 Hz, 3H).

#### 4-((2-oxa-6-azaspiro[3.4]octan-6-yl)methyl)-5-hydroxy-2-(5-hydroxypyridin-2-yl)-N-methylbenzofuran-3-carboxamide formate (33)

To a suspension of 5-hydroxy-2-(5-hydroxy-2-pyridyl)-N-methyl-benzofuran-3-carboxamide (50 mg, 0.17 mmol), 2-oxa-7-azaspiro[3.4]octane; oxalic acid (39 mg, 0.19 mmol) and DIPEA (29 mg, 0.22 mmol) in ethanol (1 mL) and water (0.2 mL) was added formaldehyde 37% solution in water (15 mg, 0.19 mmol) and the mixture was refluxed for 24 h. Saturated aqueous NaHCO<sub>3</sub> was added and the mixture was extracted with EtOAc, dried and concentrated. The residue was purified by prep HPLC (acidic, 5-50% ACN) to give the title compound (12 mg, 0.02 mmol, 14%). LCMS: m/z 410 [M+H]<sup>+</sup>. <sup>1</sup>H NMR (400 MHz, DMSO) δ 8.37 (q, J=4.5 Hz, 1H), 8.21 - 8.16 (m, 2H), 7.68 - 7.65 (m, 1H), 7.40 - 7.37

(m, 1H), 7.28 (dd,  $J=2.8, 8.7$  Hz, 1H), 6.81 - 6.78 (m, 1H), 4.51 - 4.46 (m, 4H), 3.89 (s, 2H), 2.85 (s, 2H), 2.77 - 2.75 (m, 3H), 2.61-2.55 (m, 2H), 2.12 - 2.07 (m, 2H). HRMS (ESI):  $m/z$  calcd for  $C_{22}H_{24}N_3O_5$  [ $M+H^+$ ]: 410.1716. Found 410.1612.

### Scheme S12

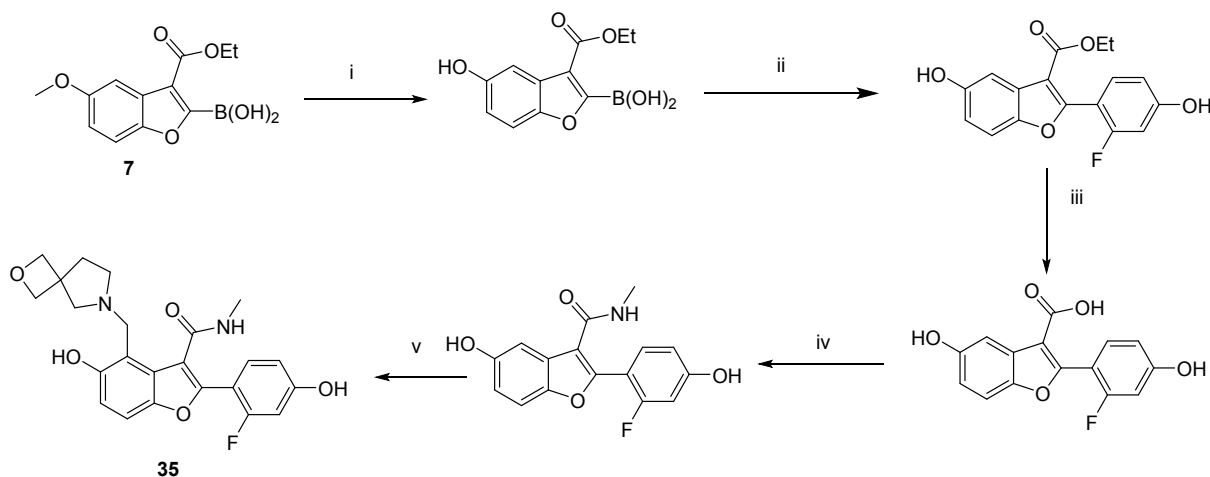

*Reagents and conditions:* (i)  $BBr_3$ , DCM, 0 °C; (ii) 4-bromo-3-fluorophenol,  $K_3PO_4$ ,  $Pd(dtbpf)Cl_2$ , THF, water, 60 °C,  $N_2$ ; (iii) KOH, water, EtOH, 50 °C; (iv) methanamine hydrochloride, EDCI, HOBT, DIPEA, DMF, 30 °C; (v) formaldehyde, 2-oxa-7-azaspiro[3.4]octane oxalic acid, EtOH, water, 60 °C.

### (3-(ethoxycarbonyl)-5-hydroxybenzofuran-2-yl)boronic acid

To a solution of (3-(ethoxycarbonyl)-5-methoxybenzofuran-2-yl)boronic acid (16.00 g, 60.60 mmol) in DCM (160 mL) was added  $BBr_3$  (45.54 g, 181.80 mmol, 17.52 mL) drop-wise at 0 °C under  $N_2$ . The reaction was stirred at 30 °C for 1h. The reaction solution was quenched by EtOH (5 mL) at 0 °C. The solution was poured into conc.  $NaHCO_3$  (500 mL). The mixture was filtered and the filtered cake was washed with  $H_2O$  (50 mL x 3), dried in vacuum to give the title compound as a white solid (25.70 g, 102.28 mmol, 84%). LCMS:  $m/z$  251 [ $M+H^+$ ].  $^1H$  NMR (400 MHz, DMSO)  $\delta$  9.47 (s, 1H), 9.13 (s, 2H), 7.51 (d,  $J=8.9$  Hz, 1H), 7.33 (d,  $J=2.5$  Hz, 1H), 6.89 (dd,  $J=2.6, 8.9$  Hz, 1H), 4.41 (q,  $J=7.1$  Hz, 2H), 1.41 (t,  $J=7.1$  Hz, 3H).

### ethyl 2-(2-fluoro-4-hydroxyphenyl)-5-hydroxybenzofuran-3-carboxylate

To a solution of (3-(ethoxycarbonyl)-5-hydroxybenzofuran-2-yl)boronic acid (2.00 g, 8.00 mmol), [1,1'-Bis(di-tert-butylphosphino)ferrocene]dichloropalladium(II) (521 mg, 0.8 mmol) and 4-bromo-3-fluorophenol (1.60 g, 8.40 mmol) in THF (80 mL) was added a solution of  $K_3PO_4$  (3.40 g, 16.00 mmol) in  $H_2O$  (16 mL) drop-wise at 0 °C under  $N_2$ . After the mixture changed to a yellow solution, the reaction mixture was stirred at 60 °C for 2 h. The mixture was poured into ice-water (w/w = 1/1) (200 mL) and stirred for 5 min. The aqueous phase was extracted with ethyl acetate (150 mL x 3). The combined organic phase was washed with brine (100 mL), dried with anhydrous  $Na_2SO_4$ , concentrated in vacuo. The residue was purified by column chromatography ( $SiO_2$ , Petroleum ether/Ethyl acetate=10/1 to 2:1) to give the title compound as a yellow solid (2.23 g, 6.67 mmol, 83%). LCMS:  $m/z$  =317 [ $M+H^+$ ].  $^1H$  NMR (400 MHz, MeOD- $d_4$ )  $\delta$  7.48 - 7.46 (m, 1H), 7.40 (d,  $J=2.4$  Hz, 1H), 7.35 (d,  $J=8.8$  Hz, 1H), 6.84 (dd,  $J=2.4, 8.8$  Hz, 1H), 6.73 (dd,  $J=2.4, 8.4$  Hz, 1H), 6.63 (dd,  $J=2.4, 12.0$  Hz, 1H), 4.28 (q,  $J=7.2$  Hz, 2H), 1.29 (t,  $J=7.2$  Hz, 3H)

## 2-(2-fluoro-4-hydroxyphenyl)-5-hydroxybenzofuran-3-carboxylic acid

To a solution of ethyl 2-(2-fluoro-4-hydroxyphenyl)-5-hydroxybenzofuran-3-carboxylate (2.20 g, 6.96 mmol) in EtOH (80 mL) was added a solution of KOH (1.56 g, 27.84 mmol) in H<sub>2</sub>O (20 mL) at 25°C. The mixture was stirred at 50°C for 5 h. The reaction mixture was poured into water (30 mL), adjusted to pH=4 with aq.HCl (2M). The mixture was filtered and the filtered cake was washed with Petroleum ether (50 mL) to give the title compound as a yellow solid (1.10 g, 3.09 mmol, 44%). LCMS: m/z =289 [M+H]<sup>+</sup>. <sup>1</sup>H NMR (400 MHz, DMSO-d<sub>6</sub>) δ 12.78 (s, 1H), 10.48 (s, 1H), 9.40 (s, 1H), 7.60 - 7.34 (m, 3H), 6.87 - 6.68 (m, 3H)

## 2-(2-fluoro-4-hydroxyphenyl)-5-hydroxy-N-methylbenzofuran-3-carboxamide

To a mixture of 2-(2-fluoro-4-hydroxyphenyl)-5-hydroxybenzofuran-3-carboxylic acid (2.0 g, 6.94 mmol) and methanamine hydrochloride (562 mg, 8.33 mmol) in DMF (50 mL) was added HOBt (1.88 g, 13.88 mmol) EDCI (2.00 g, 10.41 mmol) and DIPEA (2.69 g, 20.82 mmol, 3.63 mL) in one portion at 0 ° C. Then the mixture was stirred at 30°C for 12 h. The mixture was concentrated in vacuo. The residue was poured into ice-H<sub>2</sub>O (200 mL). The mixture was filtered and the filtered cake was washed with Petroleum ether (200 mL) to give the title compound as an off-white solid (1.1 g, 3.01 mmol, 43%). LCMS: m/z =302 [M+H]<sup>+</sup>. <sup>1</sup>H NMR (400 MHz, DMSO-d<sub>6</sub>) δ 10.41 (br s, 1H), 9.32 (s, 1H), 7.99 (d, J=8.4 Hz, 1H), 7.73 (d, J=8.4 Hz, 1H), 7.58 - 7.51(m, 2H), 7.42 (d, J=8.8 Hz, 1H), 7.03 (d, J=2.4 Hz, 1H), 6.70 - 6.67 (m, 1H), 2.73 (d, J=4.8 Hz, 3H).

## 4-((2-oxa-6-azaspiro[3.4]octan-6-yl)methyl)-2-(2-fluoro-4-hydroxyphenyl)-5-hydroxy-N-methylbenzofuran-3-carboxamide formate (35)

To a solution of 2-(2-fluoro-4-hydroxyphenyl)-5-hydroxy-N-methylbenzofuran-3-carboxamide (400 mg, 1.33 mmol) and 2-oxa-7-azaspiro[3.4]octane oxalic acid (293 mg, 1.46 mmol) in EtOH (15 mL) and H<sub>2</sub>O (3 mL) was added formaldehyde (161.64 mg, 1.99 mmol, 148.29 μL, 37% solution in water). The reaction mixture was stirred at 60 ° C for 12 h. The mixture was concentrated in vacuo. The crude product was purified by prep-HPLC (column: Phenomenex Synergi C18 150\*25\*10μm; mobile phase: [water (0.225%Formic acid)-ACN]; B%: 10%-40%, 11min) to give the title compound as a yellow solid (156 mg, 351.35 μmol, 26%). LCMS: m/z = 427 [M+H]<sup>+</sup>. <sup>1</sup>H NMR (500 MHz, DMSO) δ 8.27 - 8.20 (m, 2H), 7.45 (t, J=8.6 Hz, 1H), 7.38 - 7.35 (m, 1H), 6.82 - 6.67 (m, 3H), 4.49 - 4.44 (m, 4H), 3.93 - 3.91 (m, 2H), 2.83 (s, 2H), 2.69 - 2.67 (m, 3H), 2.60-2.53 (m, 2H) 2.10 - 2.05 (m, 2H). HRMS (ESI): m/z calcd for C<sub>23</sub>H<sub>24</sub>N<sub>2</sub>O<sub>5</sub>F [M+H]<sup>+</sup>: 427.1669. Found 427.1649.

### Scheme S13

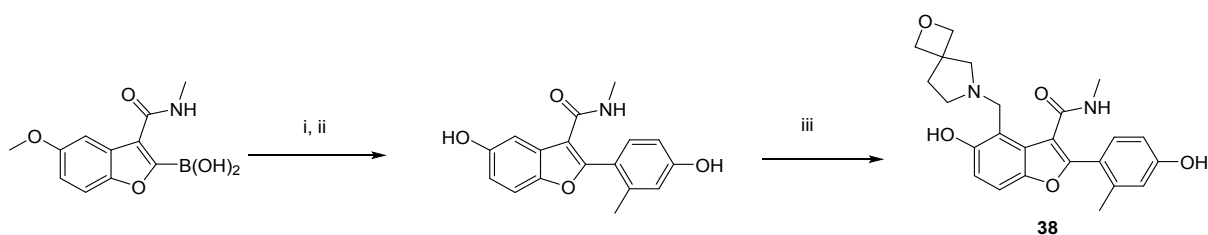

<sup>o</sup>Reagents and conditions: (i) 4-bromo-3-methyl-phenol, K<sub>2</sub>CO<sub>3</sub>, Pd(dppf)Cl<sub>2</sub>, dioxane, water, 80 °C; (ii) BBr<sub>3</sub>, DCM, -78 °C; (iii) formaldehyde, 2-oxa-7-azaspiro[3.4]octane oxalic acid, DIPEA, EtOH, water, 80°C.

## 5-hydroxy-2-(4-hydroxy-2-methylphenyl)-N-methylbenzofuran-3-carboxamide

[5-methoxy-3-(methylcarbamoyl)benzofuran-2-yl]boronic acid (200 mg, 0.80 mmol), 4-bromo-3-methyl-phenol (150 mg, 0.80 mmol), Potassium carbonate (333 mg, 2.40 mmol) and Pd(dppf)Cl<sub>2</sub> (65



mg, 0.08 mmol) were mixed in dioxane (4mL) and water (1mL) and the reaction mixture was degassed and purged with N<sub>2</sub> and then heated at 80°C for 3 h. The reaction mixture was cooled and quenched with water and then extracted with EtOAc. The combined organic extracts were washed with brine, dried and concentrated. The residue was purified by silica column chromatography (5% MeOH in DCM) to give a residue (100 mg). To a solution of the residue (100 mg, 0.32 mmol) in DCM (5mL) under N<sub>2</sub> was added tribromoborane (241 mg, 0.96 mmol) at -78°C and the mixture was stirred at the same temperature for 15 min and at rt for 2h. Aqueous sat NaHCO<sub>3</sub> was added, phases were separated and the aqueous phase was extracted with EtOAc (x3), dried and concentrated. The residue was purified by silica column chromatography (50% EtOAc in heptane) to give the title compound (86 mg, 0.26 mmol, 32%). LCMS: m/z 298 [M+H]<sup>+</sup>. <sup>1</sup>H NMR (400 MHz, DMSO) δ 9.79 (s, 1H), 9.28 (s, 1H), 7.52 - 7.50 (m, 1H), 7.39 - 7.36 (m, 1H), 7.30 - 7.27 (m, 1H), 7.11 (d, J=2.4 Hz, 1H), 6.79 - 6.68 (m, 3H), 2.68 (d, J=4.7 Hz, 3H), 2.21 (s, 3H).

**4-((2-oxa-6-azaspiro[3.4]octan-6-yl)methyl)-5-hydroxy-2-(4-hydroxy-2-methylphenyl)-N-methylbenzofuran-3-carboxamide (38)**

To a solution of the corresponding 5-hydroxy-2-(4-hydroxy-2-methylphenyl)-N-methylbenzofuran-3-carboxamide and 2-oxa-7-azaspiro[3.4]octane; oxalic acid (30 mg, 0.14 mmol) in ethanol (1mL) and water (0.2 mL) was added DIPEA (22 mg, 0.17 mmol) and formaldehyde 37% solution in water (13 mg, 0.16 mmol) and the mixture was stirred at 80°C overnight. Saturated aqueous NaHCO<sub>3</sub> was added and the mixture was extracted with EtOAc, dried and concentrated to afford a residue. Purification by prep HPLC (basic, 5-95% ACN) gave the title compound (11 mg, 0.02 mmol, 18%). LCMS: m/z 423 [M+H]<sup>+</sup>. <sup>1</sup>H NMR (400 MHz, DMSO) δ 8.13 (q, J=4.5 Hz, 1H), 7.28 (dd, J=8.6, 30.3 Hz, 2H), 6.77 - 6.63 (m, 3H), 4.50 - 4.45 (m, 4H), 3.88 (s, 2H), 2.82 (s, 2H), 2.63 (d, J=4.7 Hz, 3H), 2.57-2.50 (m, 2H), 2.27 (s, 3H), 2.11-2.05 (m, 2H).

**Scheme S14**

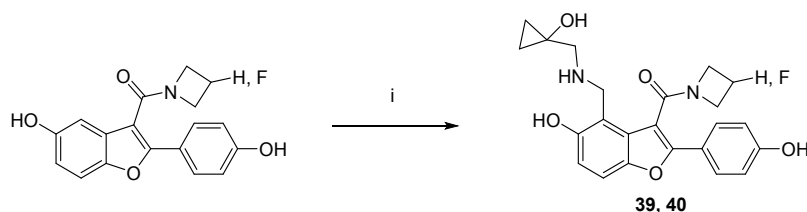

<sup>a</sup>Reagents and conditions: (i) Formaldehyde, 1-(aminomethyl)cyclopropanol, EtOH, H<sub>2</sub>O, 60 °C or microwave 100 °C.

**azetidin-1-yl(5-hydroxy-4-(((1-hydroxycyclopropyl)methyl)amino)methyl)-2-(4-hydroxyphenyl)benzofuran-3-yl)methanone formate (39)**

A solution of azetidin-1-yl(5-hydroxy-2-(4-hydroxyphenyl)benzofuran-3-yl)methanone (400 mg, 1.29 mmol), 1-(aminomethyl)cyclopropanol (191 mg, 2.19 mmol) and formaldehyde 37% solution in water (177 mg, 2.19 mmol) in EtOH (8 mL) and H<sub>2</sub>O (200 μL) was stirred at 60 °C for 40 h. The reaction solution was concentrated under vacuum to give a residue. The residue was purified by preparative HPLC (water (0.225%Formic Acid)-ACN; 10%-40%) to give the title compound (160 mg, 383 μmol, 30%). LCMS: m/z 409 [M+H]<sup>+</sup>. <sup>1</sup>H NMR (400 MHz, DMSO) δ 8.21 (s, 1H), 7.60 - 7.57 (m, 2H), 7.36 - 7.33 (m, 1H), 6.94 - 6.91 (m, 2H), 6.76 - 6.73 (m, 1H), 4.14 - 4.06 (m, 4H), 3.74-3.58 (br s, 2H), 2.69 (s, 2H), 2.18 - 2.09 (m, 2H), 0.62 - 0.58 (m, 2H), 0.51 - 0.47 (m, 2H).

**(3-fluoroazetidin-1-yl)(5-hydroxy-4-(((1-hydroxycyclopropyl)methyl)amino)methyl)-2-(hydroxyphenyl)benzofuran-3-yl)methanone formate (40)**

A mixture of 1-(aminomethyl)cyclopropanol (181 mg, 2.07 mmol), formaldehyde 37% solution in water (252 mg, 3.11mmol) and (3-fluoroazetidin-1-yl)-[5-hydroxy-2-(4-hydroxyphenyl)benzofuran-3-

yl]methanone (680 mg, 2.07 mmol) in ethanol (10 mL) and water (2 mL) were heated under microwave conditions at 100 °C for 1 h. Reaction was diluted with EtOAc then water added. EtOAc was separated and aqueous extracted with EtOAc (x3). Extracts were combined and dried over Na<sub>2</sub>SO<sub>4</sub>. Purification by silica column chromatography (EtOAc 100% gradient elution with Heptane) to give 174 mg of a yellow gum. The yellow gum was purified by acidic prep. HPLC to give the title compound. (74 mg, 0.153 mmol, 7%). LCMS: m/z 428 [M+H]<sup>+</sup>. <sup>1</sup>H NMR (400 MHz, MeOD) δ 8.47 (s, 1H), 7.64 - 7.61 (m, 2H), 7.54 - 7.51 (m, 1H), 7.01 - 6.98 (m, 3H), 5.34-5.10 (m, 1H), 4.60-4.39 (m, 3H), 4.33 - 4.17 (m, 1H), 4.03 - 3.93 (m, 1H), 3.64 (dd, *J*=10.7, 24.3 Hz, 1H), 3.18 - 3.17 (m, 2H), 0.93 - 0.74 (m, 4H). HRMS (ESI): m/z calcd for C<sub>23</sub>H<sub>24</sub>N<sub>2</sub>O<sub>5</sub>F [M+H]<sup>+</sup>: 427.1669. Found 427.1685.

#### Scheme S15

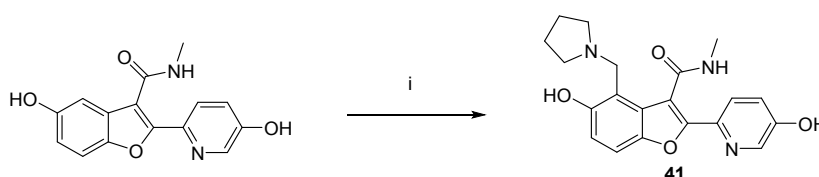

<sup>a</sup>Reagents and conditions: (i) Formaldehyde, pyrrolidine, EtOH, water, 70 °C.

#### 5-Hydroxy-2-(5-hydroxypyridin-2-yl)-N-methyl-4-(pyrrolidin-1-ylmethyl)benzofuran-3-carboxamide (41)

To a suspension of 5-hydroxy-2-(5-hydroxy-2-pyridyl)-N-methyl-benzofuran-3-carboxamide (230 mg, 0.80 mmol) in THF (8 mL) and water (1.5 mL), pyrrolidine (63 mg, 0.89 mmol) and formaldehyde 37% solution in water (85 mg, 1.05 mmol) were successively added. The mixture was stirred at 70°C overnight. Saturated aqueous NaHCO<sub>3</sub> was added and the mixture was extracted with EtOAc, dried and concentrated to afford a residue. Purification by prep HPLC (acidic, 5-95% ACN) gave the title compound (41 mg, 0.09 mmol, 11%) LCMS: m/z 368 [M+H]<sup>+</sup>. <sup>1</sup>H NMR (400 MHz, DMSO) δ 8.46 (q, *J*=4.5 Hz, 1H), 8.21 - 8.17 (m, 2H), 7.69 - 7.66 (m, 1H), 7.42 - 7.39 (m, 1H), 7.29 (dd, *J*=2.8, 8.6 Hz, 1H), 6.81 - 6.78 (m, 1H), 3.98 (s, 2H), 2.78 (d, *J*=4.7 Hz, 3H), 2.66 (s, 4H), 1.80 - 1.79 (m, 4H).

#### Scheme S16

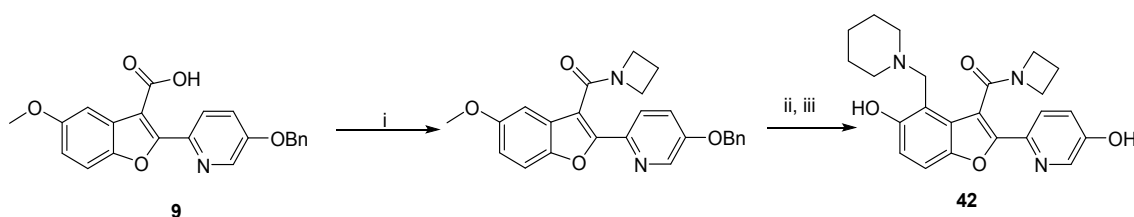

<sup>a</sup>Reagents and conditions: (i) HATU, DIPEA, azetidine, DMF, rt; (ii) BBr<sub>3</sub>, THF, 0°; (iii) formaldehyde, piperidine, AcOH, THF, water, reflux.

#### Azetidin-1-yl(2-(5-(benzyloxy)pyridin-2-yl)-5-methoxybenzofuran-3-yl)methanone

A mixture of 2-(5-(benzyloxy)pyridin-2-yl)-5-methoxybenzofuran-3-carboxylic acid (0.10 g, 0.266 mmol), HATU (0.11 g, 0.293 mmol), *N,N*-diisopropylethylamine (0.07 g, 0.532 mmol) and azetidine (0.016 g, 0.319 mmol) in DMF (3 mL) was stirred at rt for 5 h. Water was then added and the mixture was extracted with EtOAc. The combined organic extracts were washed with brine, dried and concentrated under reduced pressure. The residue was purified by column chromatography over silica gel using 50-70% EtOAc in heptanes as eluent to give the title compound (0.09 g, 0.194 mmol, 73%). LCMS: m/z 415 [M+H]<sup>+</sup>. <sup>1</sup>H NMR (400 MHz, MeOD) δ 8.49 (d, *J*=2.8 Hz, 1H), 7.95 - 7.92 (m, 1H),

7.59 (dd,  $J=2.7, 8.8$  Hz, 1H), 7.53 - 7.34 (m, 6H), 7.08 (d,  $J=2.5$  Hz, 1H), 7.01 (dd,  $J=2.6, 9.0$  Hz, 1H), 5.28 (s, 2H), 4.29 (t,  $J=7.8$  Hz, 2H), 3.88 - 3.87 (m, 5H), 2.34 - 2.26 (m, 2H).

**azetidin-1-yl(5-hydroxy-2-(5-hydroxypyridin-2-yl)-4-(piperidin-1-ylmethyl)benzofuran-3-yl)methanone (42)**

A mixture of azetidin-1-yl(2-(5-(benzyloxy)pyridin-2-yl)-5-methoxybenzofuran-3-yl)methanone (0.09 g, 0.21 mmol) and tribromoborane (0.217 g, 0.86 mmol) in THF (1 mL) was stirred at 0°C to rt overnight. Saturated aqueous ammonium chloride was added and the mixture was extracted with EtOAc. The combined organic extracts were dried over magnesium sulfate and concentrated under reduced pressure. The residue was suspended in THF (1 mL) and then water (0.2 mL), piperidine (18 mg, 0.21 mmol), acetic acid (0.05 mL) and formaldehyde 37% solution in water (18 mg, 0.24 mmol) were added and the mixture was stirred at reflux for 2 h. After cooling to ambient temperature, saturated aqueous NaHCO<sub>3</sub> was added and the mixture was extracted with EtOAc. The organic extracts were then combined and concentrated under reduced pressure. The residue was purified by mass directed HPLC, 5-95% MeCN, basic method to give the title compound (0.021 g, 0.05 mmol, 23%). LCMS:  $m/z$  408 [M+H]<sup>+</sup>. <sup>1</sup>H NMR (400 MHz, DMSO)  $\delta$  8.26 (d,  $J=2.8$  Hz, 1H), 7.73 - 7.70 (m, 1H), 7.38 - 7.28 (m, 2H), 6.79 - 6.76 (m, 1H), 4.07 (bs, 2H), 3.78 - 3.76 (m, 4H), 2.45 (bs, 4H), 2.17 (bs, 2H), 1.54 - 1.42 (m, 6H).

**Scheme S17**

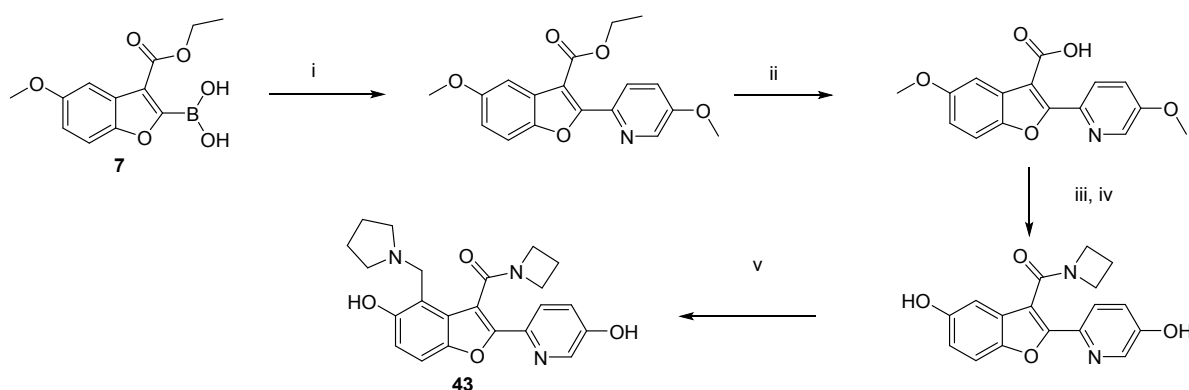

<sup>o</sup>Reagents and conditions: (i) 2-bromo-5-methoxypyridine, Pd(dppf)Cl<sub>2</sub>, K<sub>2</sub>CO<sub>3</sub>, 1,4-dioxane, water, 60°C; (ii) KOH, EtOH, water, 50°C; (iii) azetidine hydrochloride, HOBt, DIPEA, EDCI 0 °C to 25 °C; (iv) BBr<sub>3</sub>, DCM, -70 °C; (v) formaldehyde, pyrrolidine, EtOH, water, 75°C.

**ethyl 5-methoxy-2-(5-methoxypyridin-2-yl)benzofuran-3-carboxylate**

To a solution of (3-(ethoxycarbonyl)-5-methoxybenzofuran-2-yl)boronic acid (30.00 g, 113.62 mmol) and 2-bromo-5-methoxypyridine (22.00 g, 117.03 mmol) in 1,4-dioxane (200 mL) and H<sub>2</sub>O (50 mL) were added Pd(dppf)Cl<sub>2</sub> (4.16 g, 5.68 mmol) and K<sub>2</sub>CO<sub>3</sub> (31.41 g, 227.24 mmol) portionwise while the temperature was kept at 25°C under N<sub>2</sub> to give a yellow solution. The reaction mixture was stirred at 60°C for 2 h. The mixture was poured into water (50 mL) and stirred for 5 min. The aqueous phase was extracted with ethyl acetate (40 mL x 3). The combined organic phases were washed with brine (30 mL), dried with anhydrous Na<sub>2</sub>SO<sub>4</sub>, filtered and concentrated under vacuum. The residue was purified by column chromatography (SiO<sub>2</sub>, Petroleum ether/Ethyl acetate=10/1 to 2:1) to give the title compound (17.00 g, 51.93 mmol, 45%) as a white solid. <sup>1</sup>H NMR (400 MHz, CDCl<sub>3</sub>)  $\delta$  8.47 (d,  $J=2.8$  Hz, 1H), 8.18 (d,  $J=8.8$  Hz, 1H), 7.55-7.42 (m, 2H), 7.28-7.26 (m, 1H), 6.98-6.95 (m, 1H), 4.41 (q,  $J=7.2$  Hz, 2H), 3.91 (s, 3H), 3.7 (s, 3H), 1.41 (t,  $J=7.2$  Hz, 3H).

**5-methoxy-2-(5-methoxypyridin-2-yl)benzofuran-3-carboxylic acid**

To a mixture of ethyl 5-methoxy-2-(5-methoxypyridin-2-yl)benzofuran-3-carboxylate (10.00 g, 30.55 mmol) and H<sub>2</sub>O (10 mL) and EtOH (100 mL) was added KOH (6.86 g, 122.20 mmol) in one portion at

25°C. The mixture was stirred at 50°C for 3 h. The mixture was poured into aq. NaHCO<sub>3</sub> (1M, 200 mL) to give a precipitate. The solid was collected and washed with MeOH (20 mL) to give compound the title compound (9.00 g, 30.10 mmol, 98%) as a yellow solid. LCMS: m/z 300 [M+H]<sup>+</sup>. <sup>1</sup>H NMR (400 MHz, DMSO) δ 8.61 (d, J=2.4 Hz, 1H), 8.24 (d, J=8.8 Hz, 1H), 7.85 (m, 1H), 7.76 (d, J=2.4 Hz, 1H), 7.64 (d, J=8.8 Hz, 1H), 7.08-7.05 (m, 1H), 3.99 (s, 3H), 3.84 (s, 3H).

#### azetidin-1-yl(5-hydroxy-2-(5-hydroxypyridin-2-yl)benzofuran-3-yl)methanone

To a mixture of 5-methoxy-2-(5-methoxypyridin-2-yl)benzofuran-3-carboxylic acid (2.00 g, 6.68 mmol) and azetidine hydrochloride (572 mg, 6.11 mmol, 672 μL) in DMF (20 mL) were added HOBt (1.81 g, 13.36 mmol), DIPEA (4.32 g, 33.40 mmol, 5.84 mL) and EDCI (2.31 g, 12.02 mmol) in one portion at 0°C, then the mixture was stirred at 25°C for 12 h. The mixture was concentrated under vacuum. The residue was poured onto ice-H<sub>2</sub>O (10 mL) and stirred for 1 h. The aqueous phase was extracted with ethyl acetate (50 mL x 5). The combined organic phases were washed with brine (100 mL), dried over anhydrous Na<sub>2</sub>SO<sub>4</sub>, filtered and concentrated under vacuum to give a yellow solid (1.8 g). To a mixture of the yellow solid (1.00 g, 2.96 mmol) in DCM (100 mL) was added BBr<sub>3</sub> (7.40 g, 29.55 mmol, 2.85 mL) in one portion at -70°C under N<sub>2</sub>. The mixture was stirred at 40°C for 16 h. The reaction mixture was quenched with aqueous NaHCO<sub>3</sub> (1 M, 200 mL) and PE (100 mL) was added. The mixture was stirred for 5 min at 25°C and filtered. The filtered cake was washed with PE (50 mL) to give the title compound (710 mg, 2.28 mmol, 60%) as a light yellow solid. LCMS: m/z 311 [M+H]<sup>+</sup>. <sup>1</sup>H NMR (400MHz, MeOD) δ 8.36 (d, J=2.4 Hz, 1H), 8.12-8.05 (m, 1H), 7.67-7.60 (m, 1H), 7.46 (d, J=8.8 Hz, 1H), 7.03-6.91 (m, 2H), 4.32-4.00 (m, 4H), 2.42-2.28 (m, 2H).

#### azetidin-1-yl(5-hydroxy-2-(5-hydroxypyridin-2-yl)-4-(pyrrolidin-1-ylmethyl)benzofuran-3-yl)methanone formate (43)

To a solution of azetidin-1-yl(5-hydroxy-2-(5-hydroxypyridin-2-yl)benzofuran-3-yl)methanone (250 mg, 0.80 mmol) and formaldehyde 37% solution in water (130 mg, 1.61 mmol, 119.98 μL) in H<sub>2</sub>O (2 mL) and EtOH (10 mL) was added pyrrolidine (68 mg, 966 μmol, 80.8 μL). The reaction mixture was stirred at 75°C for 16 h. The mixture was filtered and concentrated under vacuum to get the residue. The residue was purified by prep-HPLC (column: Boston Green ODS 150\*30 5u; mobile phase: [water (0.225%Formic acid)-ACN]; B%: 5%-35%,10min) to give the title compound (168 mg, 427 μmol, 53%) as an off-white solid. LCMS: m/z 394 [M+H]<sup>+</sup>. <sup>1</sup>H NMR (500 MHz, MeOD) δ 8.52 (s, 1H), 8.29 (d, J=2.4 Hz, 1H), 7.82 (d, J=9.0 Hz, 1H), 7.50 (d, J=8.9 Hz, 1H), 7.33 (dd, J=2.8, 8.6 Hz, 1H), 6.97 (d, J=8.9 Hz, 1H), 4.50 (s, 2H), 4.25 (t, J=7.9 Hz, 2H), 3.76 (t, J=7.5 Hz, 2H), 3.41 (t, J=6.6 Hz, 4H), 2.27 - 2.18 (m, 2H), 2.14 - 2.09 (m, 4H). HRMS (ESI): m/z calcd for C<sub>22</sub>H<sub>24</sub>N<sub>3</sub>O<sub>4</sub> [M+H]<sup>+</sup>: 394.1767. Found 394.1786.

#### Scheme S18

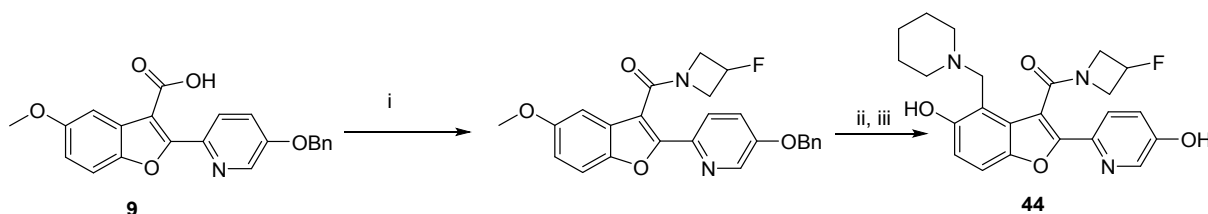

<sup>a</sup>Reagents and conditions: (i) HATU, DIPEA, 3-fluoroazetidine hydrochloride, DMF, rt; (ii) BBr<sub>3</sub>, THF, -78 °C to rt; (iii) formaldehyde, piperidine, AcOH, THF, water, 70 °C.

#### (2-(5-(benzyloxy)pyridin-2-yl)-5-methoxybenzofuran-3-yl)(3-fluoroazetidin-1-yl)methanone

To a suspension of 2-(5-benzyloxy-2-pyridyl)-5-methoxy-benzofuran-3-carboxylic acid (200 mg, 0.53 mmol) and 3-fluoroazetidine hydrochloride (62 mg, 0.55 mmol) in DMF (3mL) were successively added HATU (222 mg, 0.58 mmol) and DIPEA (206 mg, 1.59 mmol) and the mixture was stirred

overnight at rt. Water was added and the mixture was extracted with EtOAc (x3), washed with brine, dried and concentrated. The residue was purified by silica (5-10% MeOH in DCM) to give the title compound (110 mg, 0.24 mmol, 45%). LCMS: m/z 433 [M+H]<sup>+</sup>. <sup>1</sup>H NMR (400 MHz, DMSO) δ 8.52 (d, J=2.8 Hz, 1H), 7.95 - 7.91 (m, 1H), 7.69 - 7.58 (m, 2H), 7.52 - 7.37 (m, 5H), 7.04 - 6.99 (m, 2H), 5.30 - 5.28 (m, 3H), 4.50 - 4.40 (m, 1H), 4.20 - 3.97 (m, 2H), 3.84-3.67 (m, 4H).

**(3-fluoroazetidin-1-yl)(5-hydroxy-2-(5-hydroxypyridin-2-yl)-4-(piperidin-1-ylmethyl)benzofuran-3-yl)methanone formate (44)**

To a solution of [2-(5-benzyloxy-2-pyridyl)-5-methoxy-benzofuran-3-yl]-(3-fluoroazetidin-1-yl)methanone (250 mg, 0.57 mmol) in DCM (6 mL) under N<sub>2</sub> was added tribromoborane (724 mg, 2.89 mmol) at -78°C and the mixture was slowly warmed up and stirred at rt for overnight. Aqueous sat NaHCO<sub>3</sub> was added, phases were separated and the aqueous phase was extracted with EtOAc (x3), dried and concentrated to give a residue. Purification by silica chromatography (5% MeOH in DCM) gave an impure residue (175 mg, 0.47 mmol). To a solution of this residue (50 mg, 0.15 mmol) and piperidine (14 mg, 0.16 mmol) in THF (1 mL) was added formaldehyde 37% solution in water (16 mg, 0.19 mmol) and the mixture was stirred at 70 °C overnight. Saturated aqueous NaHCO<sub>3</sub> was added and the mixture was extracted with EtOAc (x 3), dried and concentrated to afford a residue. Purification by prep HPLC (acidic, 5-95% ACN) gave the title compound (23 mg, 0.04 mmol, 30%). LCMS: m/z 426 [M+H]<sup>+</sup>. <sup>1</sup>H NMR (400 MHz, DMSO) δ 8.25 (d, J=2.8 Hz, 1H), 8.17 (s, 0.5H), 7.77 - 7.74 (m, 1H), 7.40 - 7.31 (m, 2H), 6.82 - 6.78 (m, 1H), 5.52- 5.30 (m, 1H), 4.46 - 4.38 (m, 1H), 4.17 - 3.98 (m, 3H), 3.76 (s, 2H), 2.49-2.40 (m, 4H), 1.53 - 1.44 (m, 6H).

**Scheme S19**

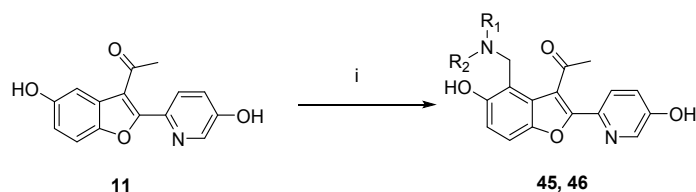

<sup>a</sup>Reagents and conditions: (i) formaldehyde, 2-oxa-6-azaspiro[3.4]octane oxalate, DIPEA, EtOH, water, 70°C, or formaldehyde, pyrrolidine, EtOH, water, 70°C.

**1-(4-((2-oxa-6-azaspiro[3.4]octan-6-yl)methyl)-5-hydroxy-2-(5-hydroxypyridin-2-yl)benzofuran-3-yl)ethan-1-one formate (45)**

To a solution of 1-(5-hydroxy-2-(5-hydroxypyridin-2-yl)benzofuran-3-yl)ethan-1-one (40 mg, 0.15 mmol) and 2-oxa-6-azaspiro[3.4]octane oxalate (33 mg, 0.16 mmol) in ethanol (1 mL) and water (0.2 mL) was added DIPEA (29 mg, 0.22 mmol) and formaldehyde 37% solution in water (16 mg, 0.19 mmol), and the reaction mixture was stirred at 70°C overnight. Saturated NaHCO<sub>3</sub> was added and the aqueous layer was extracted with EtOAc, evaporated, and purified by HPLC (5-95% MeCN/water, acidic method) to afford the title compound (6 mg, 0.01 mmol, 9%). LCMS: m/z 395 [M+H]<sup>+</sup>. <sup>1</sup>H NMR (400 MHz, DMSO) δ 8.21 (d, J=2.8 Hz, 1H), 8.18 (s, 1H), 7.79 (d, J=8.8 Hz, 1H), 7.38 - 7.31 (m, 2H), 6.88 (d, J=8.9 Hz, 1H), 4.41 (s, 4H), 3.61 (s, 2H), 2.61 (s, 2H), 2.42 (s, 3H), 2.40 - 2.36 (m, 2H), 2.06 - 1.99 (m, 2H). HRMS (ESI): m/z calcd for C<sub>22</sub>H<sub>23</sub>N<sub>2</sub>O<sub>5</sub> [M+H]<sup>+</sup>: 395.1607. Found 395.1643.

**1-(5-hydroxy-2-(5-hydroxypyridin-2-yl)-4-(pyrrolidin-1-ylmethyl)benzofuran-3-yl)ethan-1-one formate (46)**

To a solution of 1-[5-hydroxy-2-(5-hydroxy-2-pyridyl)benzofuran-3-yl]ethanone (40 mg, 0.14 mmol) in THF (1mL) and water (0.2mL), pyrrolidine (11 mg, 0.16 mmol) and formaldehyde 37% solution in water (15 mg, 0.19 mmol) were successively added. The mixture was stirred at 70°C for

3h. Saturated aqueous NaHCO<sub>3</sub> was added and the mixture was extracted with EtOAc, dried and concentrated to afford a residue. Purification by prep HPLC (acidic, 5-95% ACN) gave the title compound (17 mg, 0.04 mmol, 27%). LCMS: m/z 353 [M+H]<sup>+</sup>. <sup>1</sup>H NMR (400 MHz, DMSO) δ 8.21 - 8.17 (m, 2H), 7.80 - 7.77 (m, 1H), 7.37 - 7.31 (m, 2H), 6.87 - 6.84 (m, 1H), 3.67 (s, 2H), 2.50 (s, 3H), 2.40 - 2.39 (m, 4H), 1.68-1.63 (m, 4H).

#### Scheme S20

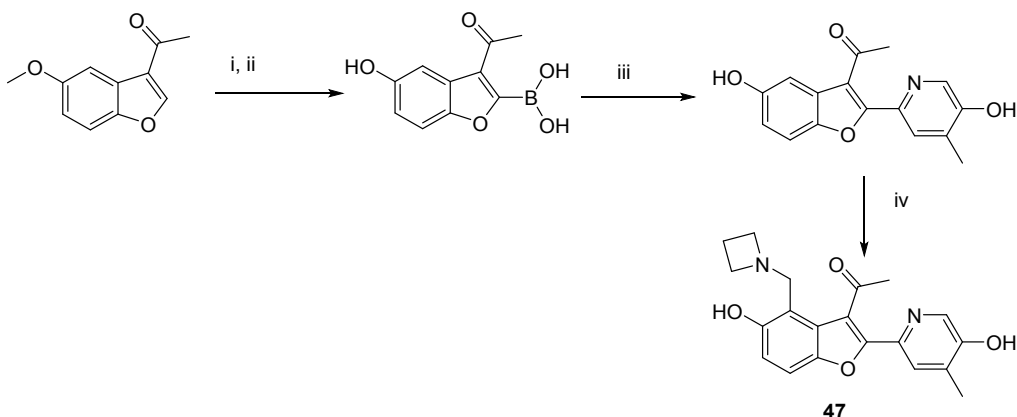

*Reagents and conditions:* (i) B(OMe)<sub>3</sub>, LDA, -78 °C 2-bromo-5-methoxypyridine, N<sub>2</sub>; (ii) BBr<sub>3</sub>, DCM, 0 °C to 20 °C; (iii) 6-bromo-4-methyl-pyridin-3-ol, 1,1'-Bis(di-tert-butylphosphino) ferrocenepalladium chloride, K<sub>3</sub>PO<sub>4</sub>, 80 °C, microwave, N<sub>2</sub>; (iv) formaldehyde, azetidine, AcOH, EtOH, 80°C.

#### (3-acetyl-5-hydroxybenzofuran-2-yl)boronic acid

To a solution of 1-(5-methoxybenzofuran-3-yl)ethanone (17.00 g, 89.38 mmol) and B(OMe)<sub>3</sub> (37.15 g, 357.52 mmol) in THF (200 mL) was added LDA (2 M, 187.70 mL) dropwise at -78 °C under N<sub>2</sub>. After addition, the solution was stirred at -78 °C for 2 h. The reaction solution was poured into aq. HCl to give a suspension. Then the resulting suspension was filtered, the filtered cake was washed with water and dried in vacuum to afford a light yellow solid (17 g). To a solution of the light yellow solid (13.00 g, 55.55 mmol) in DCM (200 mL) was added BBr<sub>3</sub> (37.96 g, 151.51 mmol) dropwise at 0 °C. After addition, the solution was stirred at 20 °C for 2 h. The solution was poured into ice water to give a suspension. Then above suspension was filtered, the filtered cake was washed with water and concentrated in vacuum to give a residue. The residue was purified by Prep-HPLC (water (0.225% formic acid)-ACN; 20%-45%) to afford the title compound (10 g, 41.59 mmol, 63 %) as a red solid. LCMS LCMS: m/z 220.9 [M+H]<sup>+</sup>. <sup>1</sup>H NMR (400 MHz, DMSO) δ 9.44 (br s, 2H), 7.49 (d, J=8.9 Hz, 1H), 7.39 (d, J=2.4 Hz, 1H), 6.87 (dd, J=2.4, 8.8 Hz, 1H), 2.64 (s, 3H)

#### 1-(5-hydroxy-2-(5-hydroxy-4-methylpyridin-2-yl)benzofuran-3-yl)ethan-1-one

A mixture of potassium phosphate tribasic (144 mg, 0.68 mmol) 1,1'-Bis(di-tert-butylphosphino) ferrocenepalladium chloride (7 mg, 0.01 mmol) 6-bromo-4-methyl-pyridin-3-ol (42 mg, 0.22 mmol), (3-acetyl-5-hydroxy-benzofuran-2-yl)boronic acid (50 mg, 0.22 mmol) in THF (1.5 mL) and water (1.5mL) was purged with N<sub>2</sub> and heated in the microwave at 80°C. Once the reaction completed by TLC water (10 mL) was added and the reaction extracted with ethylacetate (10 mL x 2), washed with brine (10 mL x 2), dried over MgSO<sub>4</sub> and concentration to dryness. The crude was then purified by silica flash column chromatography eluting (10 % Ethylacetate:Hexane) to give the title compound (20 mg, 0.067 mmol, 29%). LCMS: m/z 284 [M+H]<sup>+</sup>. <sup>1</sup>H NMR (500 MHz, DMSO) δ 10.47 (br s, 1H), 9.41 (br s, 1H), 8.23 (s, 1H), 7.77 (s, 1H), 7.47 - 7.44 (m, 1H), 7.28 (d, J=2.4 Hz, 1H), 6.83 (dd, J=2.6, 8.9 Hz, 1H), 2.40 (s, 3H), 2.26 (s, 3H).

### 1-(4-(azetidin-1-ylmethyl)-5-hydroxy-2-(5-hydroxy-4-methylpyridin-2-yl)-2,3-dihydrobenzofuran-3-yl)ethan-1-one formate (47)

To a solution of 1-[5-Hydroxy-2-(5-hydroxy-4-methyl-2-pyridyl)benzofuran-3-yl]ethanone (31 mg, 0.11 mmol), azetidine (16 mg, 0.28 mmol) and formaldehyde 37% solution in water (22 mg, 0.28 mmol) in ethanol (0.70 mL), was added one drop of a solution of acetic acid (one drop acetic acid dissolved into 1 mL ethanol) and the mixture was heated at 80°C overnight. Saturated aqueous NaHCO<sub>3</sub> was added and the mixture was extracted with EtOAc and evaporated to afford a residue. The residue was purified by preparative HPLC using 5- 95% gradient elution of 0.1% formic acid: ACN, mixture solvent, desired fraction evaporated to give the title compound (13 mg, 0.03 mmol, 30%). LCMS: m/z 353 [M+H]<sup>+</sup>. <sup>1</sup>H NMR (500 MHz, MeOD) δ 8.46 (s, 1H), 8.16 (s, 1H), 7.76 (s, 1H), 7.53 (d, J = 9.0 Hz, 1H), 7.01 (d, J = 8.9 Hz, 1H), 4.55 (s, 2H) 4.32 (dd, J = 7.9, 7.9 Hz, 4H), 2.59 - 2.50 (m, 2H), 2.45 - 2.41 (m, 3H), 2.34 (s, 3H). HRMS (ESI): m/z calcd for C<sub>20</sub>H<sub>21</sub>N<sub>2</sub>O<sub>4</sub> [M+H]<sup>+</sup>: 353.1501. Found 353.1503.

### HPLC traces for *in vivo* compounds

Compound 1- TAM16 synthesis described in a previous paper

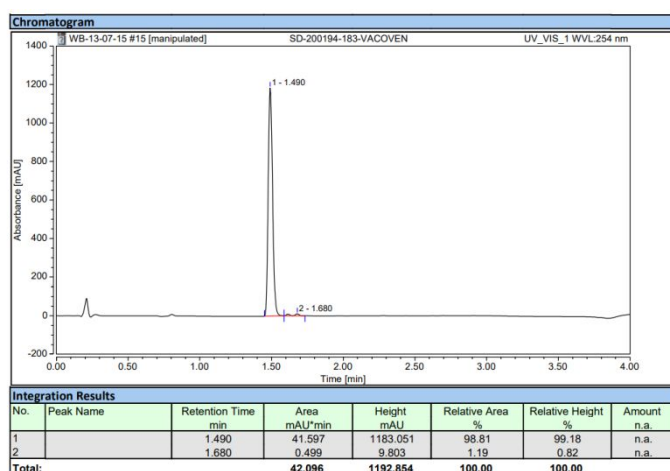

### Compound 13

Sample Description 200282-073-001

Method 3-microtof-2 Identify  
Compounds BASIC LCMS Pos  
5-95.m

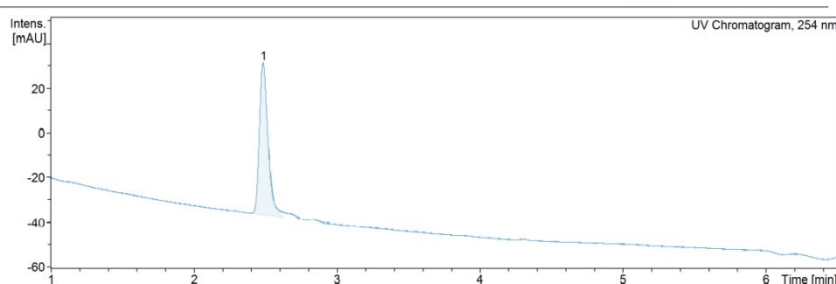

| # | RT [min] | Area       | Area Frac. % |
|---|----------|------------|--------------|
| 1 | 2.5      | 280.39     | 100.000      |
| 2 | 2.5      | 5798509.50 | 100.000      |

#### SmartFormula Settings

Tolerance mSigma Limit Electron Conf.  
2 mDa 20 even

## Compound 16

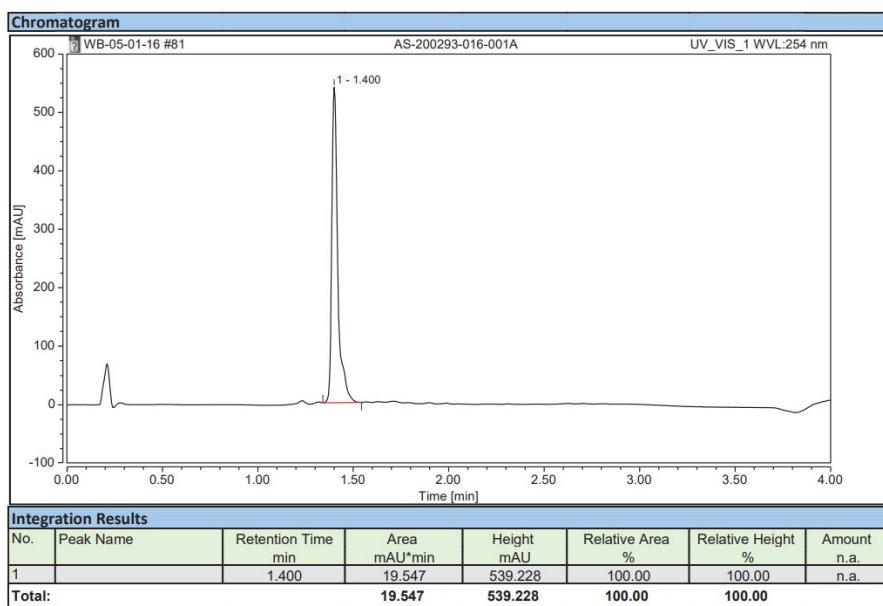

## Compound 6

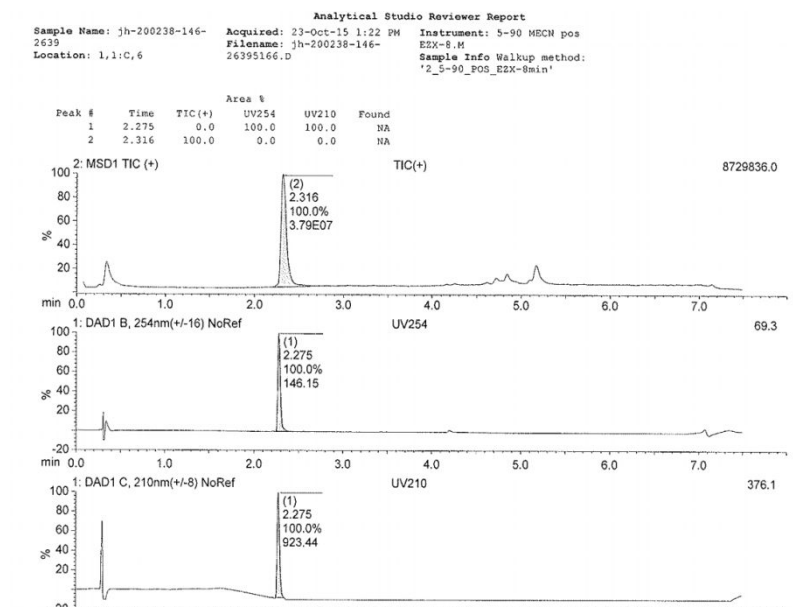



## Compound 26

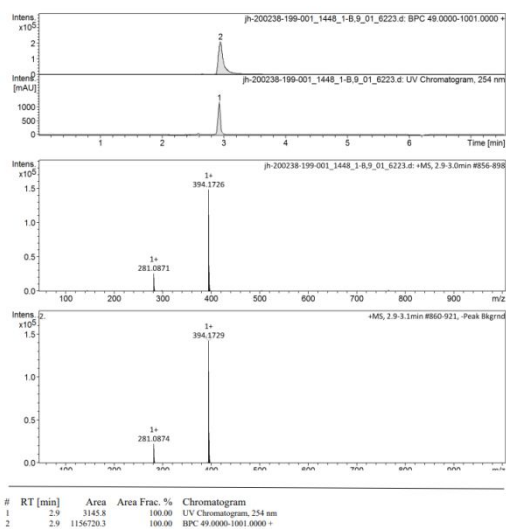

## Compound 35

Sample-ID DU1\_A120 Station Microtof-2  
 Submitter Nicola Caldwell Supervisor System Administrator  
 Analysis Name DU1\_A120\_9532\_RB3\_01\_10252.d Acquisition Date 29/11/2016 17:31:34  
 Sample Description Method 1-microtof-2 Identify  
 Compounds LCMS Pos 5-95.m

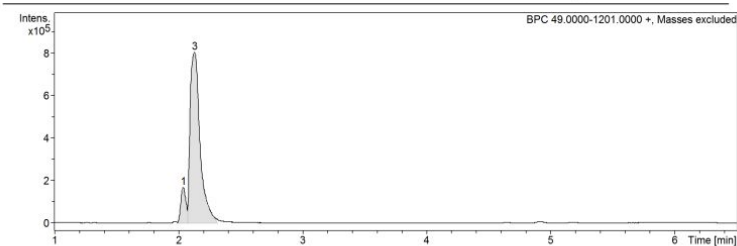

Sample Description Method 1-microtof-2 Identify  
 Compounds LCMS Pos 5-95.m

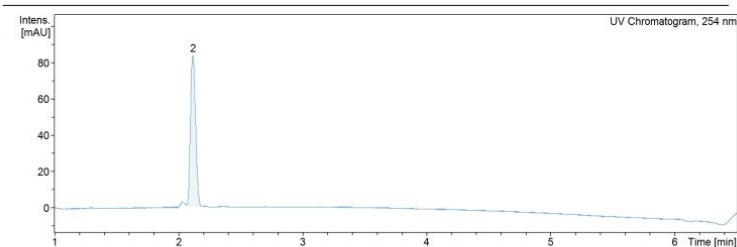

| # | RT [min] | Area    | Area Frac. %                             | Chromatogram |
|---|----------|---------|------------------------------------------|--------------|
| 1 | 2.0      | 9.851   | BPC 49.0000-1201.0000 +, Masses excluded |              |
| 2 | 2.1      | 100.000 | UV Chromatogram, 254 nm                  |              |
| 3 | 2.1      | 90.149  | BPC 49.0000-1201.0000 +, Masses excluded |              |

## Compound 36

Sample Name: CH-200296-071- Acquired: 15-Feb-16 2:18 PM Instrument: 5-90 MS/MS pos  
 001 File Name: CH-200296-071- ESI-MS  
 Location: 1,1,F,7 0011154.D Sample Info Walkup method: \*2\_5-90\_Pos\_ESI-8min\*

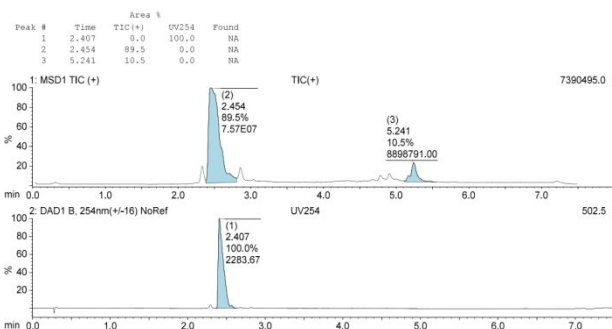

## Compound 40

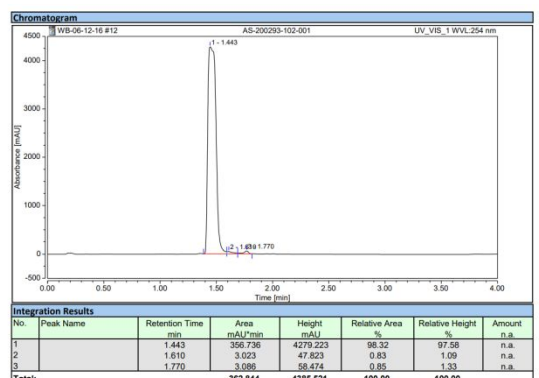

## Compound 43

Sample Description 200282-106-002

Method 1-microtof-2 Identify  
Compounds LCMS Pos 5-95.m

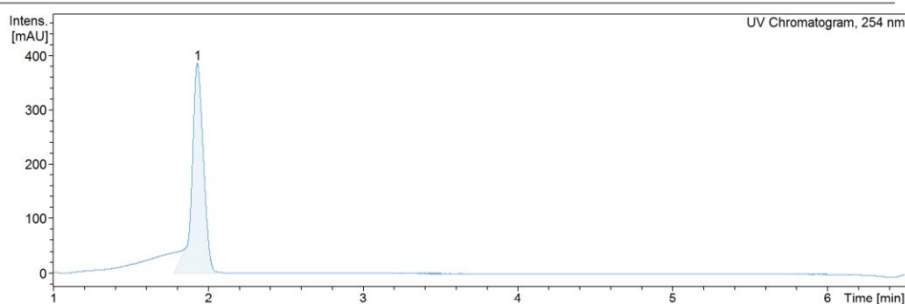

| # | RT [min] | Area Frac. % | Chromatogram                             |
|---|----------|--------------|------------------------------------------|
| 1 | 1.9      | 100.00       | UV Chromatogram, 254 nm                  |
| 2 | 1.9      | 100.00       | BPC 49.0000-1201.0000 +, Masses excluded |

## Compound 45

Sample Name: jh-200333-054-002  
Location: 1,2:A,2  
Acquired: 27-Apr-16 1:27 PM  
Filename: jh-200333-054-0025532.D  
Instrument: 5-90 MECN pos  
EZX-8.M  
Sample Info Walkup method: '2\_5-90\_POS\_EZX-8min'

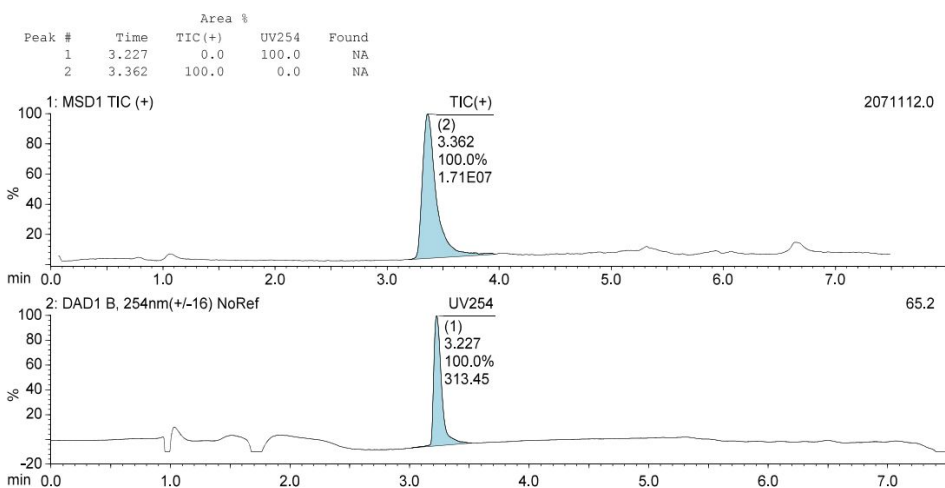

# Compound 12

Sample Name: jh-200333-060-001  
Acquired: 20-May-16 1:19 PM  
Instrument: 5-90 MECN pos  
Filename: jh-200333-060-0016150.D  
EZX-8.M  
Sample Info Walkup method: '2\_5-90\_FOS\_EZX-8min'

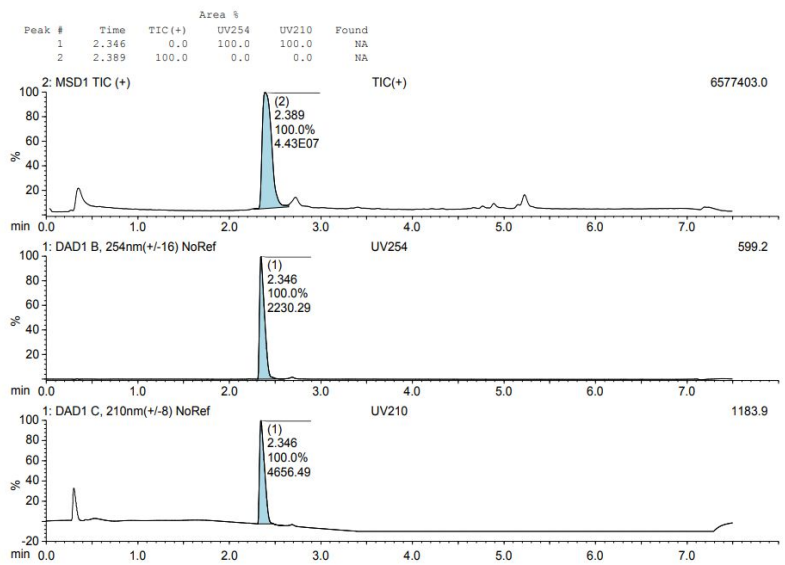

Supplement: jm1c01586_si_001.pdf [file jm1c01586_si_001.pdf]
